# Supplementary material for: PhICl2 is activated by chloride ions
Source: Royal Society of Chemistry journal article supplement (doi:10.1039/d1dt02565a), 2021-01-01
Supplement: d1dt02565a1.pdf [file d1dt02565a1.pdf]

## Electronic Supplementary information

### PhICl<sub>2</sub> is activated by chloride ions

Tania,<sup>a</sup> Tiffany B. Poynder,<sup>a</sup> Aishvaryadeep Kaur,<sup>a</sup> Lachlan Barwise,<sup>a</sup> Sevan D. Houston,<sup>a</sup> Akshay J. Nair,<sup>b</sup> Jack K. Clegg,<sup>b</sup> David J. D. Wilson<sup>a</sup> and Jason L. Dutton<sup>a\*</sup>

<sup>a</sup>Department of Chemistry and Physics, La Trobe University, Melbourne, Victoria, Australia

<sup>b</sup>School of Chemistry and Molecular Biosciences, The University of Queensland, St Lucia, Queensland, Australia, 4072

## Table of Contents

|                                                          |           |
|----------------------------------------------------------|-----------|
| <b>1. EXPERIMENTAL SECTION</b> .....                     | <b>1</b>  |
| I. Experimental Details .....                            | 1         |
| II. Reaction Procedures.....                             | 2         |
| i. Syntheses .....                                       | 2         |
| ii. Conversion of Anisole to p-Chloroanisole .....       | 3         |
| iii. Decomposition of PhICl <sub>2</sub> with time ..... | 4         |
| iv. BindFit NMR titrations procedure.....                | 5         |
| v. Electrochemical procedure .....                       | 6         |
| III. NMR Investigations.....                             | 7         |
| i. Conversion of anisole to p-chloroanisole .....        | 7         |
| ii. Decomposition of PhICl <sub>2</sub> .....            | 24        |
| iii. BindFit experiment.....                             | 28        |
| IV. Electrochemical Analysis .....                       | 30        |
| V. X-ray Crystallographic Details .....                  | 30        |
| <b>2. COMPUTATIONAL SECTION</b> .....                    | <b>31</b> |
| <b>3. REFERENCES</b> .....                               | <b>32</b> |

## 1. EXPERIMENTAL SECTION

### I. Experimental Details

All reagents were purchased from Sigma Aldrich and used as received. CDCl<sub>3</sub> was stirred over CaH<sub>2</sub> for 24 hours, distilled and stored over 3 angstrom molecular sieves in the glovebox, although used as received had no effect on conversions. The BindFit experiments were prepared in an N<sub>2</sub> filled glove box. The reagents and solvents used for these experiments were air and water free. NMR spectra for all experiments were recorded using Bruker Ultrashield Plus 500 MHz and Ascend 400 MHz

spectrometers. The abbreviations used to report NMR signal multiplicity are s = singlet, d = doublet, t = triplet, m = multiplet.

## II. Reaction Procedures

### i. Syntheses

#### a. Iodobenzene dichloride<sup>1</sup>

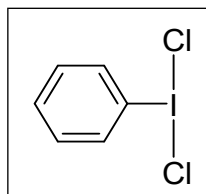

In a conical flask, PhI (0.5 mL, 5mmol) was cooled to 0 °C on ice bath. HCl (10 mL, 10M) was added dropwise while stirring followed by 3-4 drops of H<sub>2</sub>O<sub>2</sub> (30%).

Gradually, a yellow solid sticking to the walls of flask was observed. After two hours,

solid was collected by filtration and washed free of chloride with water. The air-dried solid was then dissolved in minimal CH<sub>2</sub>Cl<sub>2</sub> and dried over anhydrous MgSO<sub>4</sub>. The filtered solution was stored at -20 °C resulting in overnight formation of crystals. The yellow needle like crystals were collected and identified as title compound (1.10 g, 89%).

<sup>1</sup>H NMR (400 MHz, CDCl<sub>3</sub>): δ 8.19-8.18 (2H, d), 7.62-7.58 (1H, t), 7.48-7.46 (2H, t).

#### b. 3-Chloro-4-dimethylaminopyridine<sup>1</sup>

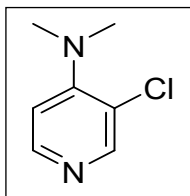

Iodobenzene dichloride (200 mg, 0.728 mmol) was dissolved in CHCl<sub>3</sub> (6 mL) in a reaction flask. 4-Dimethylaminopyridine (178 mg, 1.46 mmol) dissolved in CHCl<sub>3</sub> (0.5 mL) was added to the flask. The mixture was stirred for 15 minutes. Subsequently, hexane

was added to reaction mixture and a white solid precipitated. The precipitate was removed via centrifugation and identified as 4-dimethylaminopyridine.HCl by <sup>1</sup>H NMR via comparison with a genuine sample. The supernatant was collected, and volatiles were removed in vacuo to give a colourless liquid. The liquid was dissolved in CHCl<sub>3</sub> (1 mL), and triflic acid (64 μL, 0.728 mmol) was added dropwise as a CHCl<sub>3</sub> solution, with stirring. Diethyl ether (5 mL) was added to yield a white precipitate which was collected via centrifugation (m/z = 157.13). The solid was dissolved in H<sub>2</sub>O (1 mL) and basified with 1M NaOH (approx. 1 mL) until pH 14. The aqueous solution was extracted with CH<sub>2</sub>Cl<sub>2</sub> (3 x 5 mL). The organic layers were combined and washed with H<sub>2</sub>O (3 x 10 mL) and subsequently dried over MgSO<sub>4</sub> and filtered. Volatiles were removed in vacuo to give the title compound as a colourless liquid (70 mg, 61%).

$^1\text{H}$  NMR (400 MHz,  $\text{CDCl}_3$ ):  $\delta$  8.32 (1H, s), 8.22-8.20 (1H, d), 6.75-6.74 (1H, d), 2.99 (6H, s).

$^{13}\text{C}$  NMR (400 MHz,  $\text{CDCl}_3$ ):  $\delta$  155.50, 150.24, 147.68, 121.66, 112.82, 42.32.

c. Pyridine hydrochloride salts

A reaction flask was charged with the respective pyridine (2 mmol) and dissolved in  $\text{Et}_2\text{O}$  (2 mL). 2M  $\text{HCl}\cdot\text{Et}_2\text{O}$  (1.1 eq., 2.20 mmol) was added dropwise while continuously stirring. White precipitates were formed immediately. The solid was isolated *via* centrifugation, washed with  $\text{Et}_2\text{O}$  ( $3 \times 2$  mL) and dried under vacuum to give an HCl salt of the respective pyridine.

Pyridine.HCl  $^1\text{H}$  NMR (400 MHz,  $\text{CDCl}_3$ ):  $\delta$  8.88-8.87 (2H, d), 8.49-8.45 (1H, t), 7.48-7.46 (2H, t).

4-DMAP.HCl  $^1\text{H}$  NMR (400 MHz,  $\text{CDCl}_3$ ):  $\delta$  8.12-8.08 (2H, t), 6.77-6.75 (2H, d), 3.23 (6H, s).

3-Cl-4-DMAP.HCl  $^1\text{H}$  NMR (400 MHz,  $\text{CDCl}_3$ ):  $\delta$  8.25 (1H, s), 8.14-8.12 (1H, d), 6.88-6.87 (1H, d), 3.37 (6H, s).

d. Pyridine hydrotriflate salt

A reaction flask was charged with respective pyridine (2 mmol) and dissolved in  $\text{Et}_2\text{O}$  (2 mL). Triflic acid (1.1 eq., 2.20 mmol) dissolved in  $\text{Et}_2\text{O}$  was added dropwise while continuously stirring. White precipitates were formed immediately. The solid was isolated *via* centrifugation, washed with  $\text{Et}_2\text{O}$  ( $3 \times 2$  mL) and dried under vacuum to give an HOTf salt of the respective pyridine.

Pyridine.HOTf  $^1\text{H}$  NMR (400 MHz,  $\text{CDCl}_3$ ):  $\delta$  8.94-8.93 (2H, d), 8.53-8.51 (1H, t), 8.06-8.02 (2H, t).

4-DMAP.HOTf  $^1\text{H}$  NMR (400 MHz,  $\text{CDCl}_3$ ):  $\delta$  8.15-8.12 (2H, t), 6.77-6.75 (2H, d), 3.26 (6H, s).

e. Crystals of  $\text{PhICl}_2\text{-NEt}_4\text{Cl}$

Tetraethylammonium chloride (3 mg, 0.018 mmol) was added to a warm solution of  $\text{PhICl}_2$  (5 mg, 0.018 mmol) in minimum dichloromethane. The reaction mixture was stirred until the solution turned clear before cooling ( $-20\text{ }^\circ\text{C}$ ). Pale yellow needle-like crystals (91%) were obtained overnight.

ii. Conversion of Anisole to p-Chloroanisole

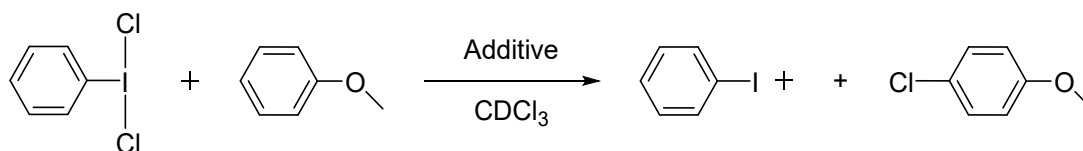

PhICl<sub>2</sub> was dissolved in CDCl<sub>3</sub> to obtain a 0.09 M solution. Subsequently, anisole (1 eq.) and the additive were added to the solution. The reaction was stirred for 1 hour. An aliquot (600 μL) was taken at t = 1 hour and <sup>1</sup>H NMR was recorded. The amounts of PhICl<sub>2</sub>, anisole, CDCl<sub>3</sub> and respective additive used in each reaction are summarised in Table S1.

Table S1. Amounts of PhICl<sub>2</sub>, anisole, CDCl<sub>3</sub> and respective additive used.

| Additive Name         | mol% of additive | Amount of PhICl <sub>2</sub> (mg) | Amount of Anisole (mg) | Amount of CDCl <sub>3</sub> (mL) | Amount of additive |
|-----------------------|------------------|-----------------------------------|------------------------|----------------------------------|--------------------|
| None                  | 0                | 25                                | 9.8                    | 1                                | -                  |
| Pyridine              | 20%              | 50                                | 19.6                   | 2                                | 2.9 μL             |
| Pyridine.HCl          | 20%              | 50                                | 19.6                   | 2                                | 4.2 mg             |
| Pyridine.HOTf         | 20%              | 25                                | 9.8                    | 1                                | 4.2 mg             |
| Pyridine.HOTf         | 50%              | 25                                | 9.8                    | 1                                | 10.4 mg            |
| NBu <sub>4</sub> Cl   | 20%              | 25                                | 9.8                    | 1                                | 5.0 mg             |
| HCl.Et <sub>2</sub> O | 20%              | 100                               | 39.3                   | 4                                | 36 μL              |
| NBu <sub>4</sub> OTf  | 20%              | 25                                | 9.8                    | 1                                | 7.1 mg             |
| 4-DMAP                | 20%              | 50                                | 19.6                   | 2                                | 4.4 mg             |
| 4-DMAP.HCl            | 20%              | 50                                | 19.6                   | 2                                | 5.8 mg             |
| 4-DMAP.HOTf           | 20%              | 25                                | 9.8                    | 1                                | 5.0 mg             |
| 3-Cl-4-DMAP           | 20%              | 50                                | 19.6                   | 2                                | 5.7 mg             |
| 3-Cl-4-DMAP.HCl       | 20%              | 50                                | 19.6                   | 2                                | 7.0 mg             |
| NBu <sub>4</sub> Cl   | 5%               | 100                               | 39.3                   | 4                                | 5.0 mg             |
| NaCl                  | 20%              | 50                                | 19.6                   | 2                                | 2.1 mg             |
| LiCl                  | 20%              | 100                               | 39.3                   | 4                                | 3.1 mg             |
| LiCl                  | 50%              | 50                                | 19.6                   | 2                                | 7.7 mg             |

iii. Decomposition of PhICl<sub>2</sub> with time

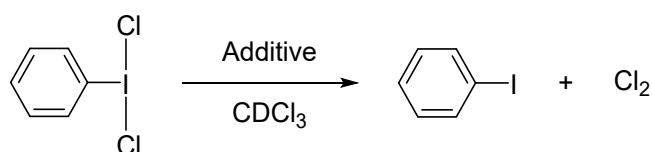

PhICl<sub>2</sub> was dissolved in CDCl<sub>3</sub> to obtain a 0.09 M solution. Subsequently, the additive was added to the solution. The amount of solution in vial was marked as initial volume. The reaction was stirred in an open vial. Aliquots (600 μL) were taken from reaction vial for periodic NMR analysis at t = 10 minutes, 30 minutes, 1 hour, 2 hours, 3 hours and 4 hours. Then, the vial was covered with perforated parafilm to minimize CDCl<sub>3</sub> loss to evaporation. The reaction was continuously stirred for 20 hours. CDCl<sub>3</sub> was

topped up to initial volume mark and another NMR was recorded. The amounts of  $\text{PhICl}_2$ ,  $\text{CDCl}_3$  and respective additive used in each reaction are summarised in Table S2.

Table S2. Amounts of  $\text{PhICl}_2$ ,  $\text{CDCl}_3$  and respective additive used.

| Additive Name             | Amount of $\text{PhICl}_2$ | Amount of $\text{CDCl}_3$ | Amount of additive |
|---------------------------|----------------------------|---------------------------|--------------------|
| None                      | 100 mg                     | 1 mL                      | 0 mg               |
| Pyridine                  | 50 mg                      | 2 mL                      | 2.9 $\mu\text{L}$  |
| Pyridine.HCl              | 50 mg                      | 1 mL                      | 4.2 mg             |
| Pyridine.HOTf             | 25 mg                      | 1 mL                      | 4.2 mg             |
| $\text{NBu}_4\text{Cl}$   | 25 mg                      | 2 mL                      | 5 mg               |
| $\text{HCl.Et}_2\text{O}$ | 100 mg                     | 4 mL                      | 36 $\mu\text{L}$   |
| $\text{NBu}_4\text{OTf}$  | 25 mg                      | 1 mL                      | 7.12 mg            |
| $\text{LiCl}$             | 100 mg                     | 4 mL                      | 3.1 mg             |

iv. BindFit NMR titrations procedure

$\text{PhICl}_2$  was dissolved in  $\text{CDCl}_3$  to form a stock solution. Aliquots (600  $\mu\text{L}$ ) of stock solution were then transferred to six different vials. To each vial, amount of additive corresponding to 1, 2, 3, 4, 5 and 10 equivalents was added. The reaction mixtures were taken for NMR analysis. The concentration of  $\text{PhICl}_2$  for each reaction was calculated by comparing ratio of  $\text{PhICl}_2$  and  $\text{PhI}$  by NMR integration with actual concentration of stock solution. The corresponding amounts of all components used for each manipulation are summarised in Table S3 and Table S4 for  $\text{NBu}_4\text{Cl}$  and  $\text{NBu}_4\text{OTf}$ , respectively. The data obtained from NMR investigation was processed using BindFit<sup>2</sup> to calculate the binding constant.

Table S3. Amounts of components involved in  $\text{PhICl}_2$ - $\text{NBu}_4\text{Cl}$  BindFit experiment.

| Stock Solution Concentration: 0.036M $\text{PhICl}_2$ in $\text{CDCl}_3$ |                             |                                    |                              |                                           |                                    |
|--------------------------------------------------------------------------|-----------------------------|------------------------------------|------------------------------|-------------------------------------------|------------------------------------|
| NMR Tube no.                                                             | $\text{PhICl}_2$ equivalent | $\text{NBu}_4\text{Cl}$ equivalent | $\text{NBu}_4\text{Cl}$ (mg) | $\text{NBu}_4\text{Cl}$ Concentration (M) | $\text{PhICl}_2$ Concentration (M) |
| 1                                                                        | 1                           | 1                                  | 6.1                          | 0.037                                     | 0.022                              |
| 2                                                                        | 1                           | 2                                  | 12.2                         | 0.074                                     | 0.020                              |
| 3                                                                        | 1                           | 3                                  | 18.3                         | 0.111                                     | 0.014                              |
| 4                                                                        | 1                           | 4                                  | 24.4                         | 0.148                                     | 0.015                              |
| 5                                                                        | 1                           | 5                                  | 30.5                         | 0.185                                     | 0.016                              |
| 6                                                                        | 1                           | 10                                 | 60.6                         | 0.370                                     | 0.006                              |

Table S4. Amounts of components involved in PhICl<sub>2</sub>-NBu<sub>4</sub>OTf BindFit experiment.

| Stock Solution Concentration: 0.023M PhICl <sub>2</sub> in CDCl <sub>3</sub> |                               |                                 |                           |                                        |                                      |
|------------------------------------------------------------------------------|-------------------------------|---------------------------------|---------------------------|----------------------------------------|--------------------------------------|
| NMR Tube no.                                                                 | PhICl <sub>2</sub> equivalent | NBu <sub>4</sub> OTf equivalent | NBu <sub>4</sub> OTf (mg) | NBu <sub>4</sub> OTf Concentration (M) | PhICl <sub>2</sub> Concentration (M) |
| 1                                                                            | 1                             | 1                               | 5.3                       | 0.023                                  | 0.023                                |
| 2                                                                            | 1                             | 2                               | 10.6                      | 0.045                                  | 0.023                                |
| 3                                                                            | 1                             | 3                               | 15.9                      | 0.068                                  | 0.023                                |
| 4                                                                            | 1                             | 4                               | 21.2                      | 0.091                                  | 0.023                                |
| 5                                                                            | 1                             | 5                               | 26.5                      | 0.114                                  | 0.023                                |
| 6                                                                            | 1                             | 10                              | 53.0                      | 0.227                                  | 0.023                                |

v. Electrochemical procedure

An electrochemical cell was set-up using a CH instruments 660E potentiostat, using a GC electrode as the working, Au wire as auxiliary, and an Ag/Ag<sup>+</sup> reference electrode was sheathed with an internal solution of 0.1 M TBAPF<sub>6</sub>. The electrolyte solutions were prepared under an inert atmosphere to minimise the amount of water and oxygen in the solution.

The GC electrode was cleaned prior with acetone and ethanol washes, and polished using 0.3 μm alumina. The Au wire was cleaned prior to use with acetone and ethanol washes and sanded back with P3000 silicon carbide sandpaper. Each experiment contained 1 ml of 0.1 M TBAPF<sub>6</sub> electrolyte, with 1.5 mM of PhICl<sub>2</sub>. Potentials were scanned between -3 V to +4 V to determine electroactive working window, and 0 to -3 V for observing reductions of PhICl<sub>2</sub> at 200 mV/s. To calibrate the redox potentials, ferrocene was added and E<sub>p</sub><sup>1/2</sup> determined for Fc/Fc<sup>+</sup> for each experiment.

### III. NMR Investigations

( a = PhICl<sub>2</sub>, b = PhI, c = Anisole, d = 4-Chloroanisole, e = 2-chloroanisole, f = corresponding pyridinium chloride)

#### i. Conversion of anisole to p-chloroanisole

##### a. PhICl<sub>2</sub> only

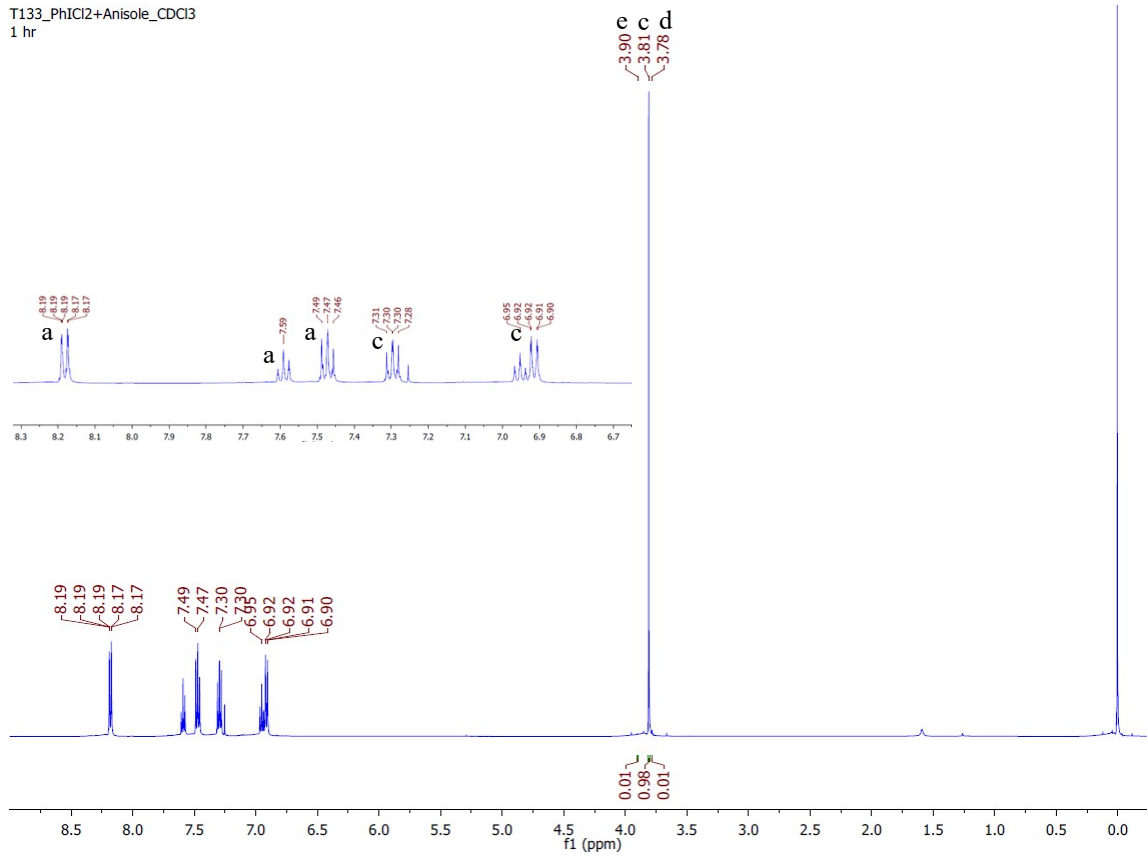

Figure S1. <sup>1</sup>H NMR spectrum of PhICl<sub>2</sub> and anisole at t = 1 hour in CDCl<sub>3</sub>.

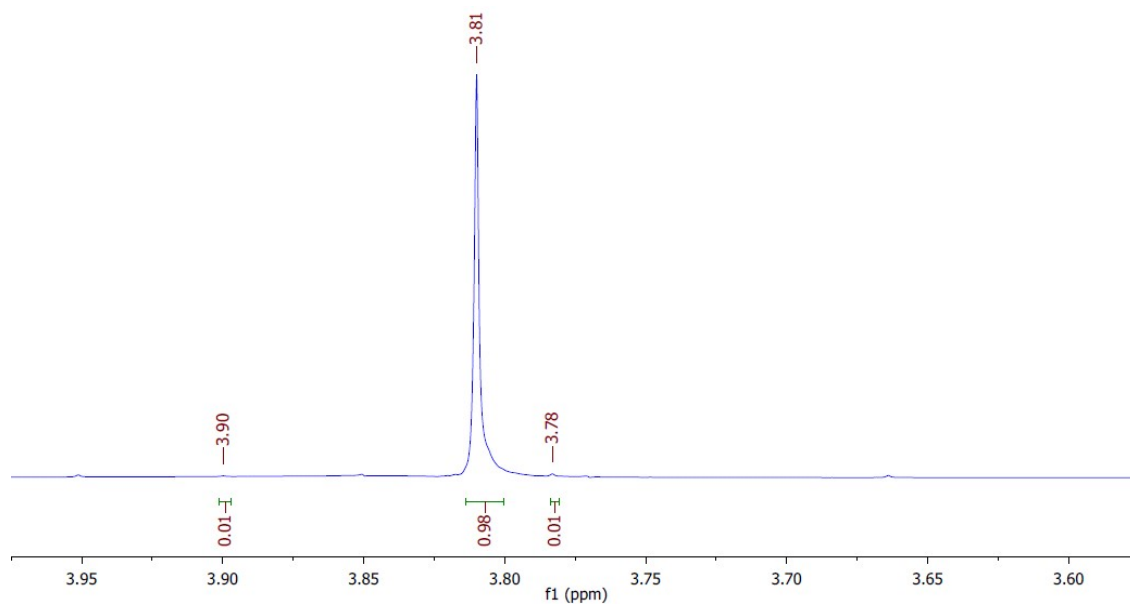

Figure S2.  $^1\text{H}$  NMR spectrum of  $\text{PhICl}_2$  and anisole at  $t = 1$  hour in  $\text{CDCl}_3$  showing normalised integrals for anisole methyl (3.81 ppm), 2-chloroanisole methyl (3.90 ppm) and 4-chloroanisole methyl (3.78 ppm) protons.

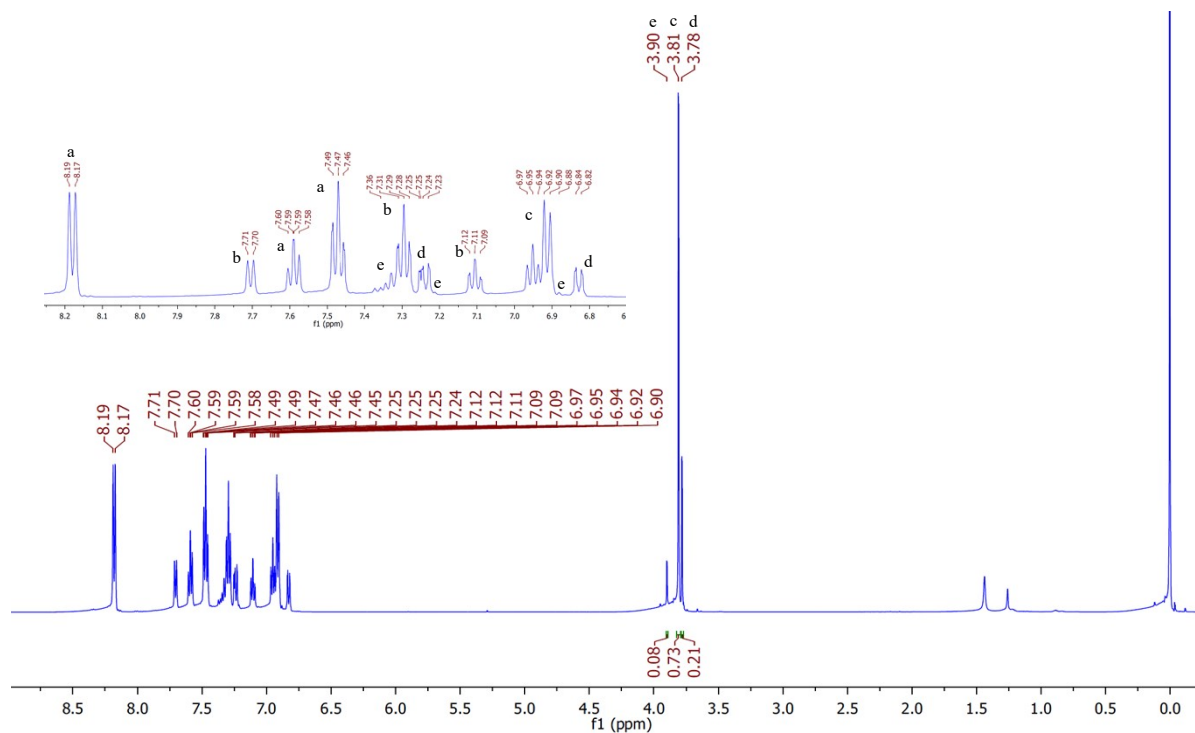

Figure S3.  $^1\text{H}$  NMR spectrum of  $\text{PhICl}_2$  and anisole at  $t = 20$  hours in  $\text{CDCl}_3$ .



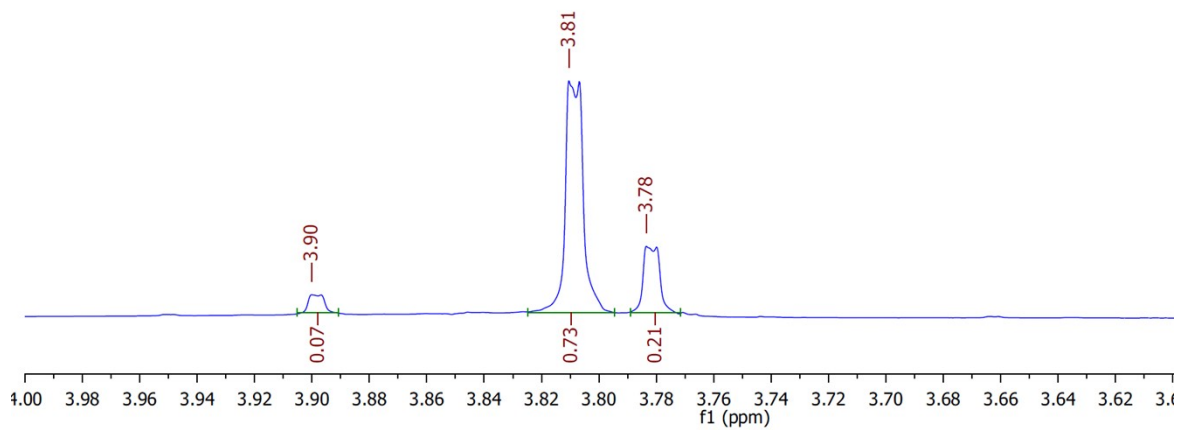

Figure S4.  $^1\text{H}$  NMR spectrum of  $\text{PhICl}_2$  and anisole at  $t = 20$  hours in  $\text{CDCl}_3$  showing normalised integrals for anisole methyl (3.81 ppm), 2-chloroanisole methyl (3.90 ppm) and 4-chloroanisole methyl (3.78 ppm) protons.

b.  $\text{PhICl}_2 + \text{Pyridine}$  (20%)

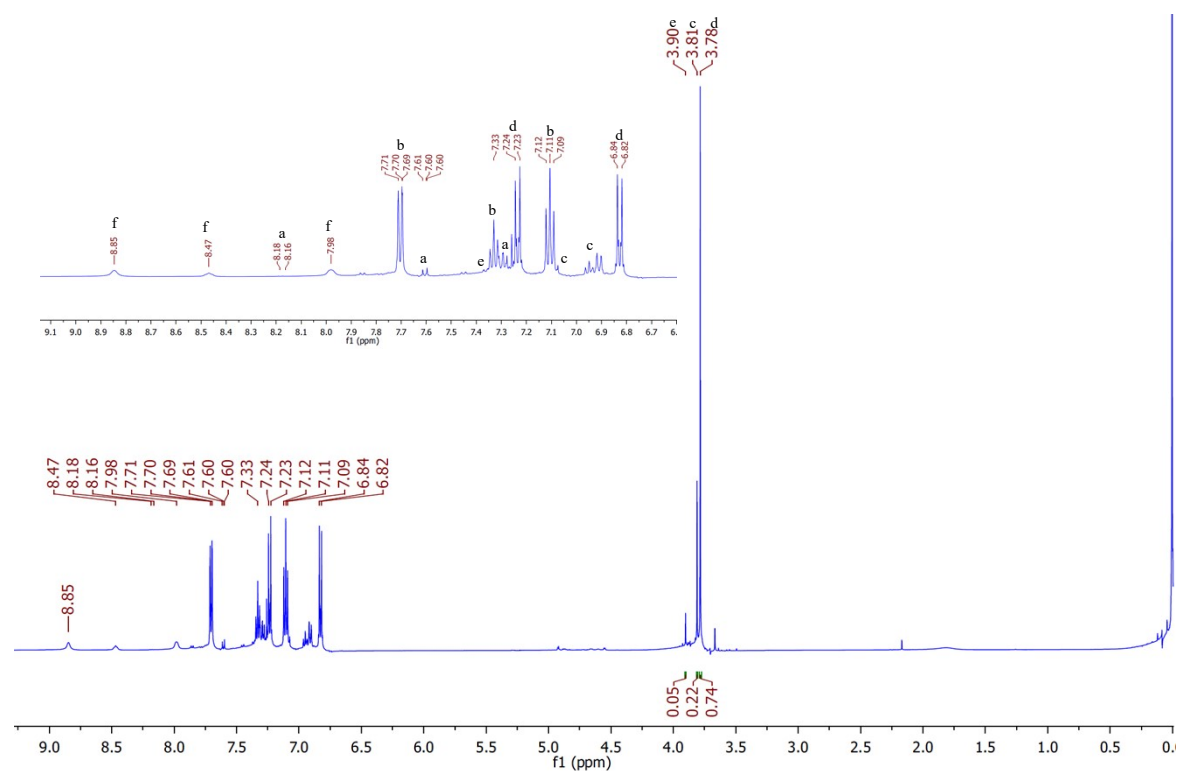

Figure S5.  $^1\text{H}$  NMR spectrum of  $\text{PhICl}_2$ , anisole and 20% pyridine at  $t = 1$  hour in  $\text{CDCl}_3$ .

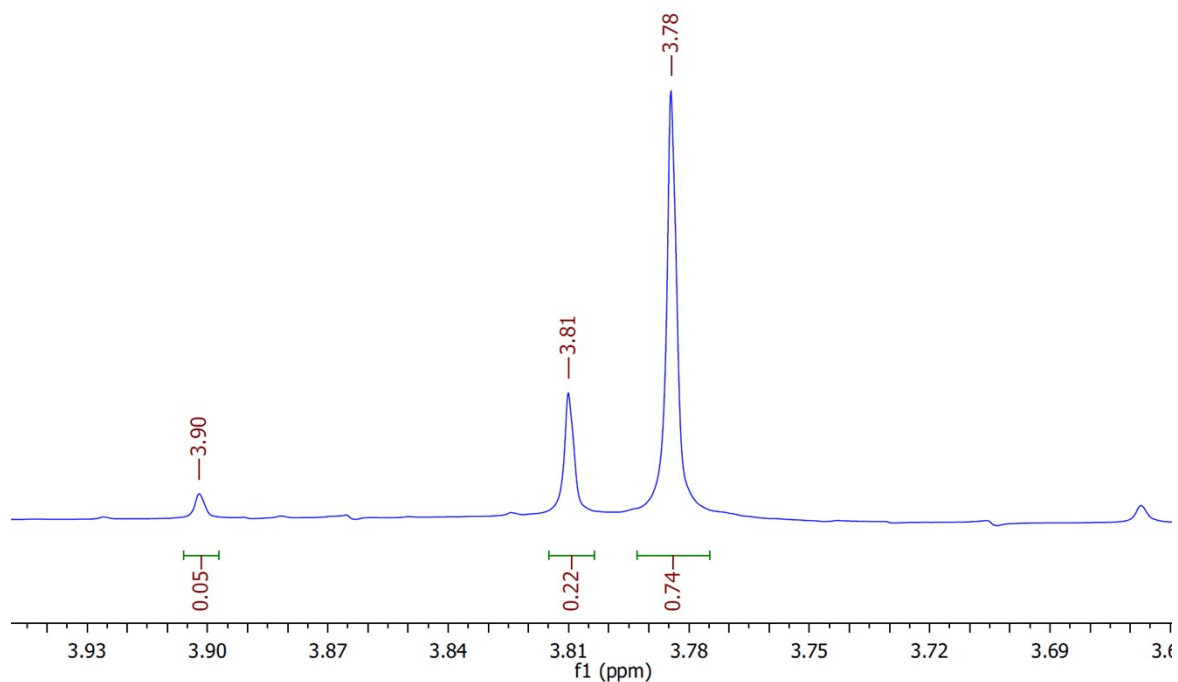

Figure S6.  $^1\text{H}$  NMR spectrum of  $\text{PhICl}_2$ , anisole and 20% pyridine at  $t = 1$  hour in  $\text{CDCl}_3$  showing normalised integrals for anisole methyl (3.81 ppm), 2-chloroanisole methyl (3.90 ppm) and 4-chloroanisole methyl (3.78 ppm) protons.

c.  $\text{PhICl}_2 + \text{Pyridine.HCl}$  (20%)

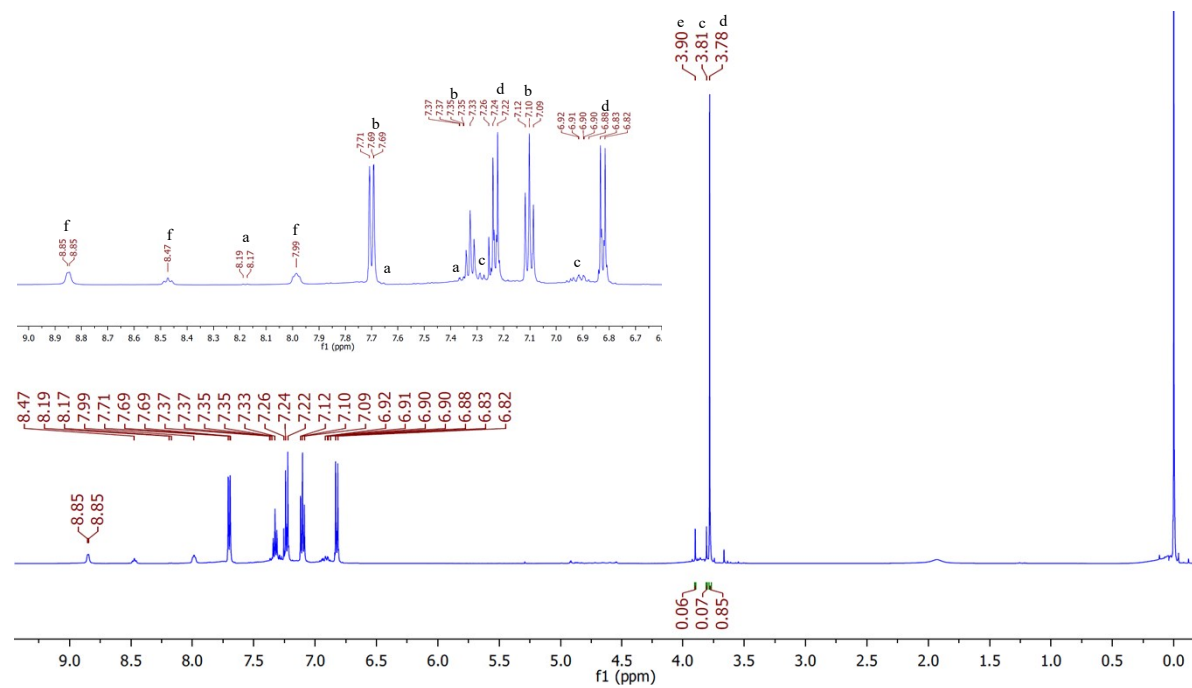

Figure S7.  $^1\text{H}$  NMR spectrum of  $\text{PhICl}_2$ , anisole and 20% pyridine.HCl at  $t = 1$  hour in  $\text{CDCl}_3$ .

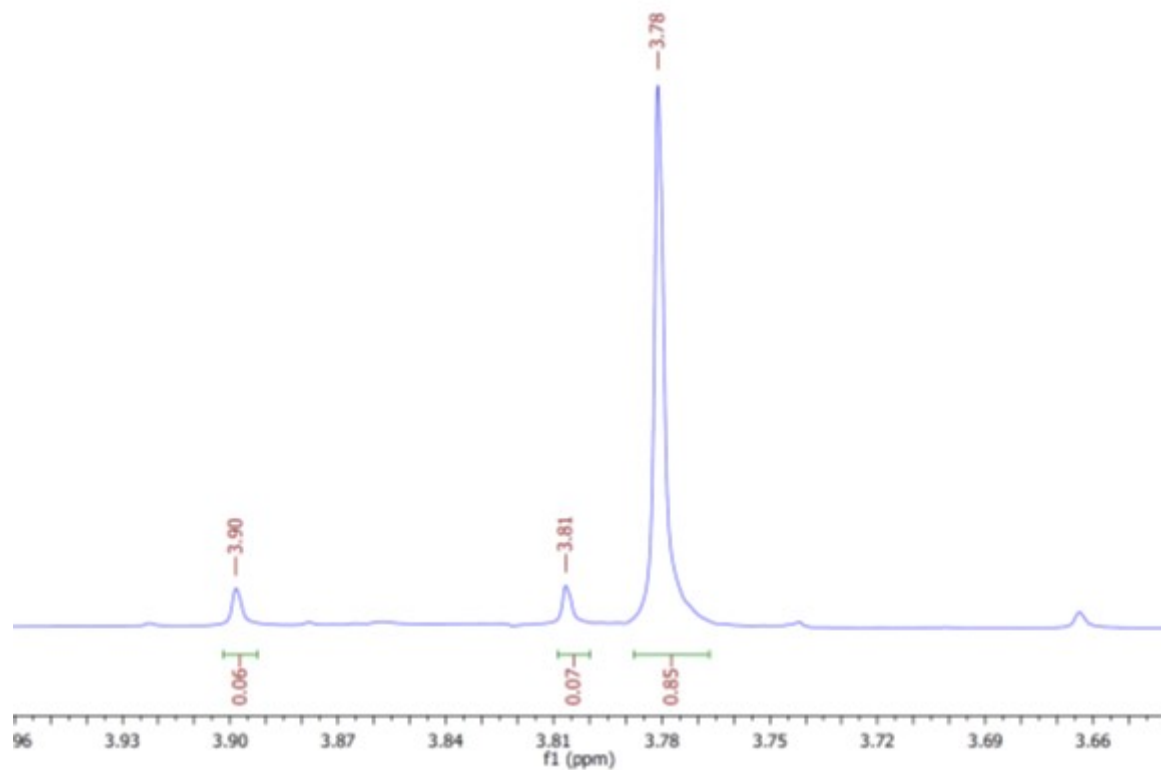

Figure S8.  $^1\text{H}$  NMR spectrum of  $\text{PhICl}_2$ , anisole and 20% pyridine.HCl at  $t = 1$  hour in  $\text{CDCl}_3$  showing normalised integrals for anisole methyl (3.81 ppm), 2-chloroanisole methyl (3.90 ppm) and 4-chloroanisole methyl (3.78 ppm) protons.

d.  $\text{PhICl}_2 + \text{Pyridine.HOTf}$  (20%)

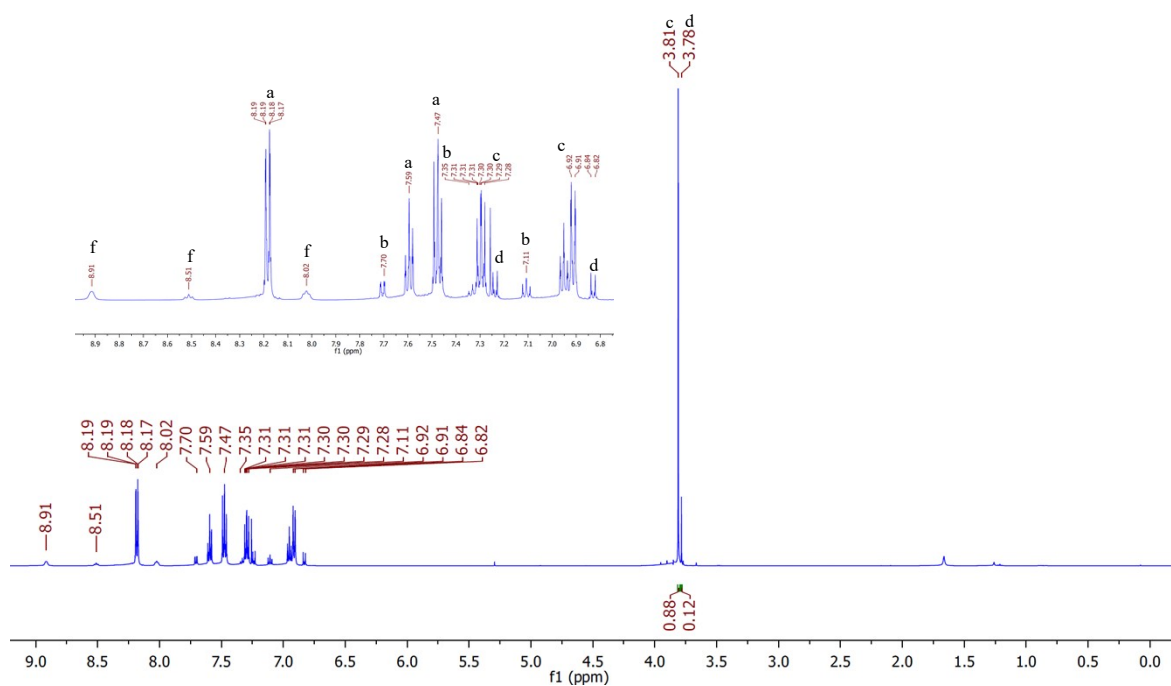

Figure S9.  $^1\text{H}$  NMR spectrum of  $\text{PhICl}_2$ , anisole and 20% pyridine.HOTf at  $t = 1$  hour in  $\text{CDCl}_3$ .

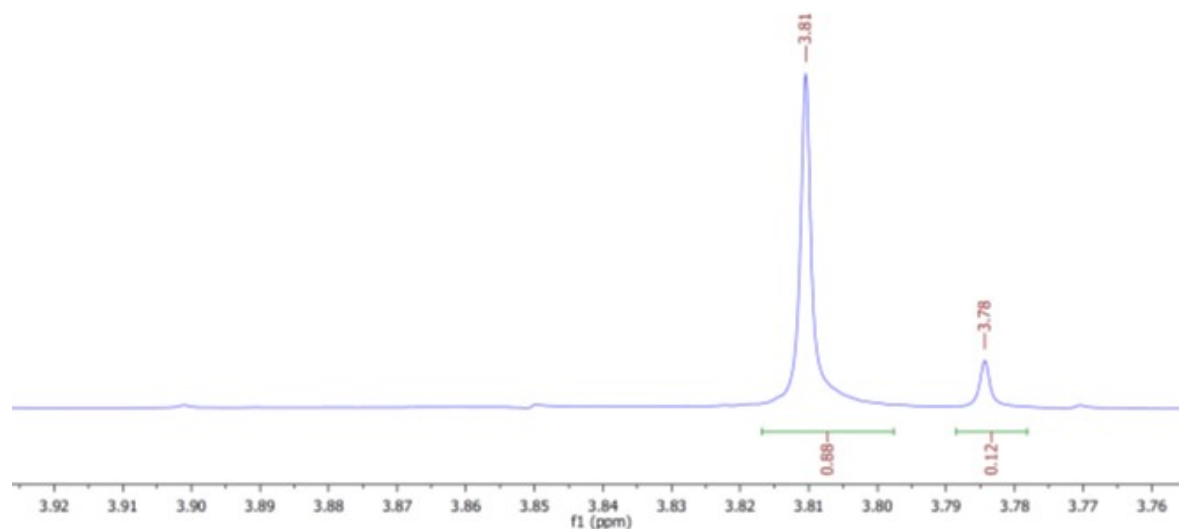

Figure S10.  $^1\text{H}$  NMR spectrum of  $\text{PhICl}_2$ , anisole and 20% pyridine.HOTf at  $t = 1$  hour in  $\text{CDCl}_3$  showing normalised integrals for anisole methyl (3.81 ppm), 2-chloroanisole methyl (3.90 ppm) and 4-chloroanisole methyl (3.78 ppm) protons.

e.  $\text{PhICl}_2 + \text{Pyridine.HOTf}$  (50%)

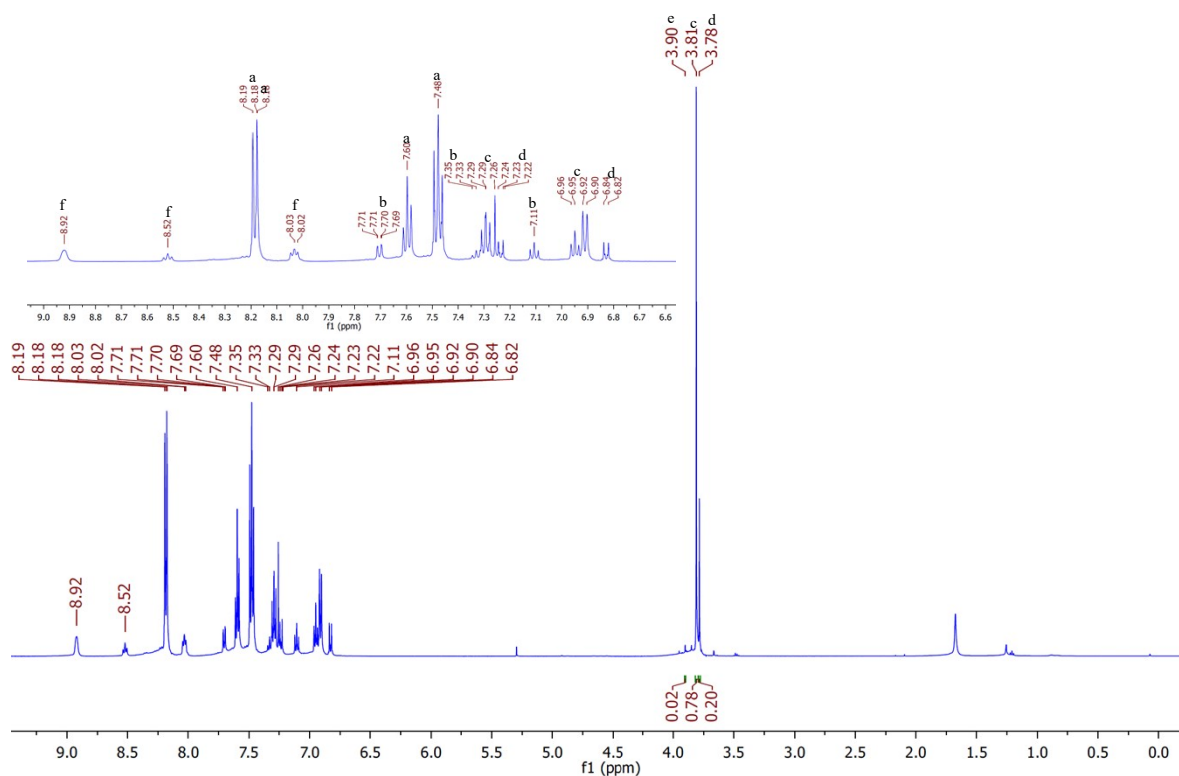

Figure S11.  $^1\text{H}$  NMR spectrum of  $\text{PhICl}_2$ , anisole and 50% pyridine.HOTf at  $t = 1$  hour in  $\text{CDCl}_3$ .

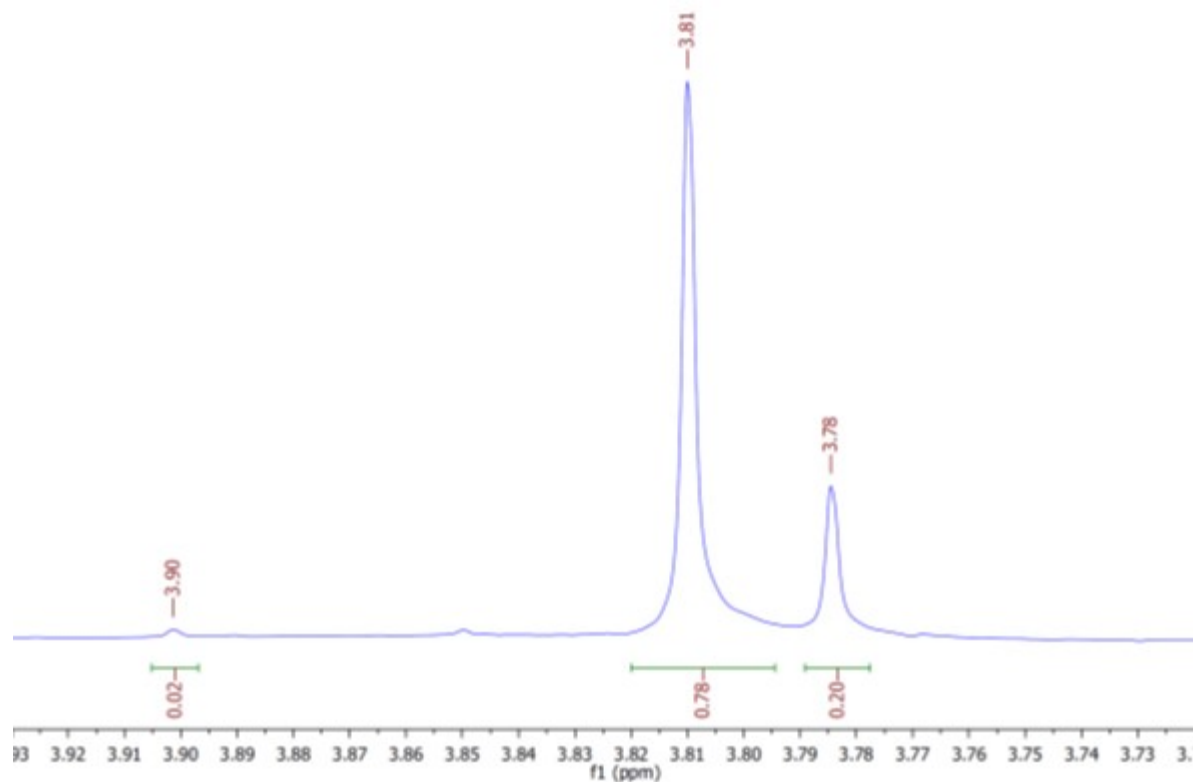

Figure S12.  $^1\text{H}$  NMR spectrum of  $\text{PhICl}_2$ , anisole and 50% pyridine.HOTf at  $t = 1$  hour in  $\text{CDCl}_3$  showing normalised integrals for anisole methyl (3.81 ppm), 2-chloroanisole methyl (3.90 ppm) and 4-chloroanisole methyl (3.78 ppm) protons.

f.  $\text{PhICl}_2 + \text{NBu}_4\text{Cl}$  (20%)

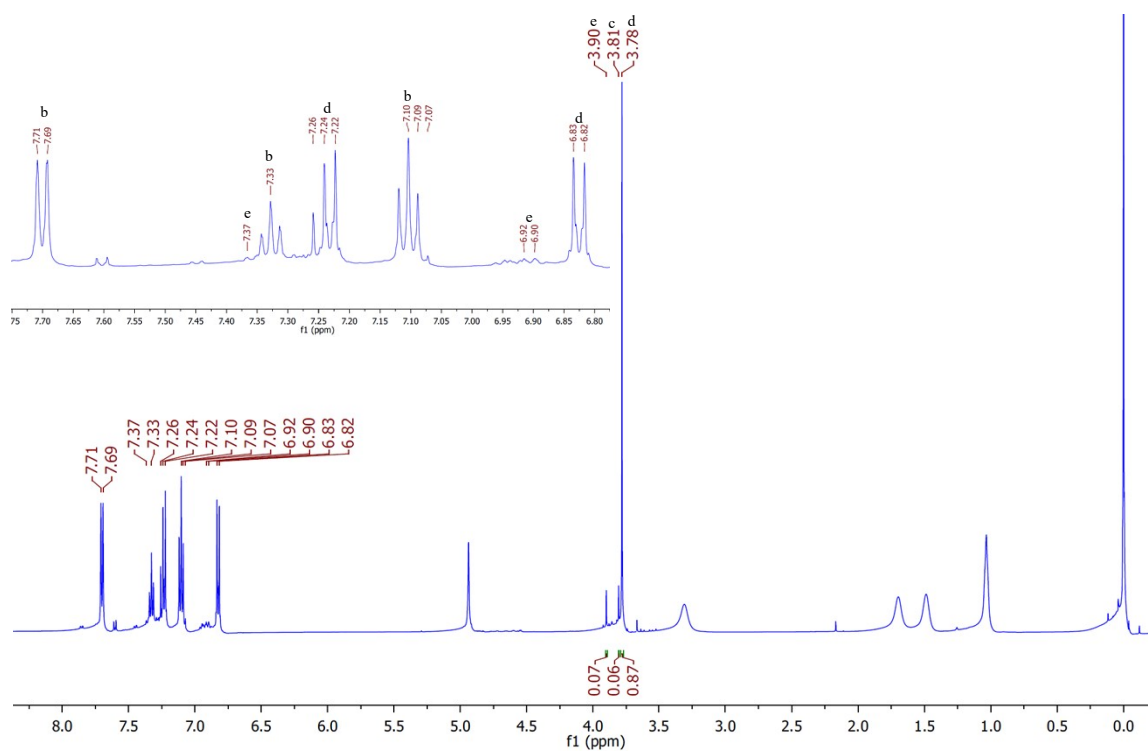

Figure S13.  $^1\text{H}$  NMR spectrum of  $\text{PhICl}_2$ , anisole and 20%  $\text{NBu}_4\text{Cl}$  at  $t = 1$  hour in  $\text{CDCl}_3$ .

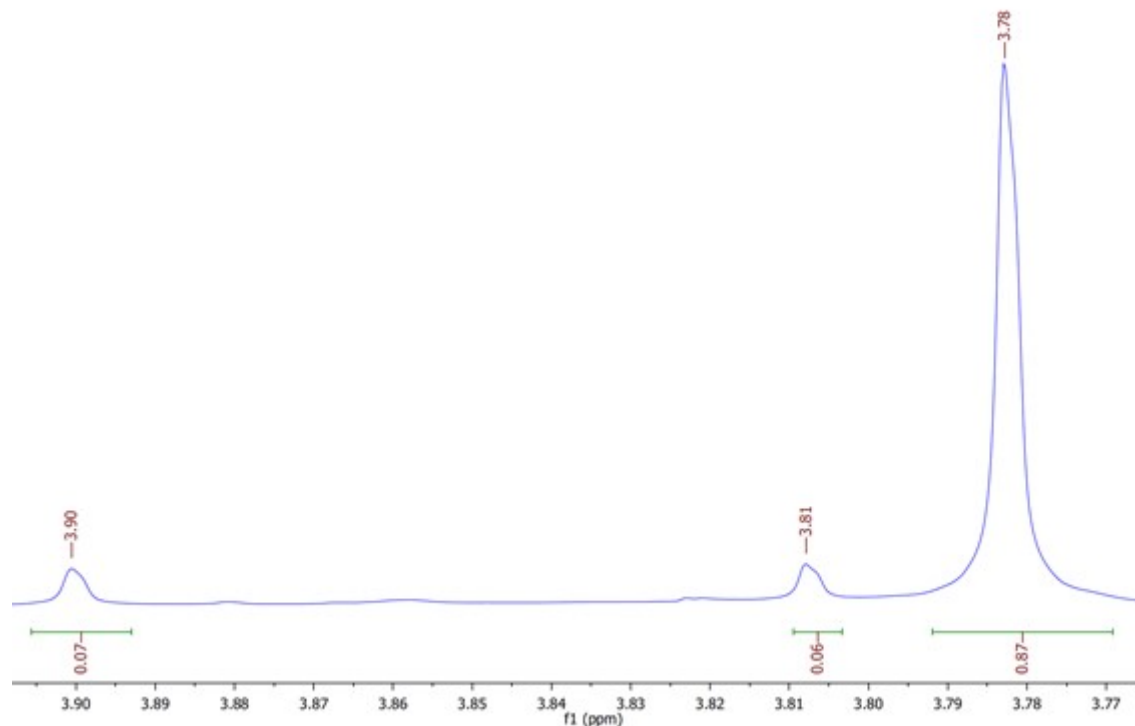

Figure S14. Methyl region  $^1\text{H}$  NMR spectrum of  $\text{PhICl}_2$ , anisole and 20%  $\text{NBu}_4\text{Cl}$  at  $t = 1$  hour in  $\text{CDCl}_3$  showing normalised integrals for anisole methyl (3.81 ppm), 2-chloroanisole methyl (3.90 ppm) and 4-chloroanisole methyl (3.78 ppm) protons.

g.  $\text{PhICl}_2 + \text{HCl}\cdot\text{Et}_2\text{O}$  (20%)

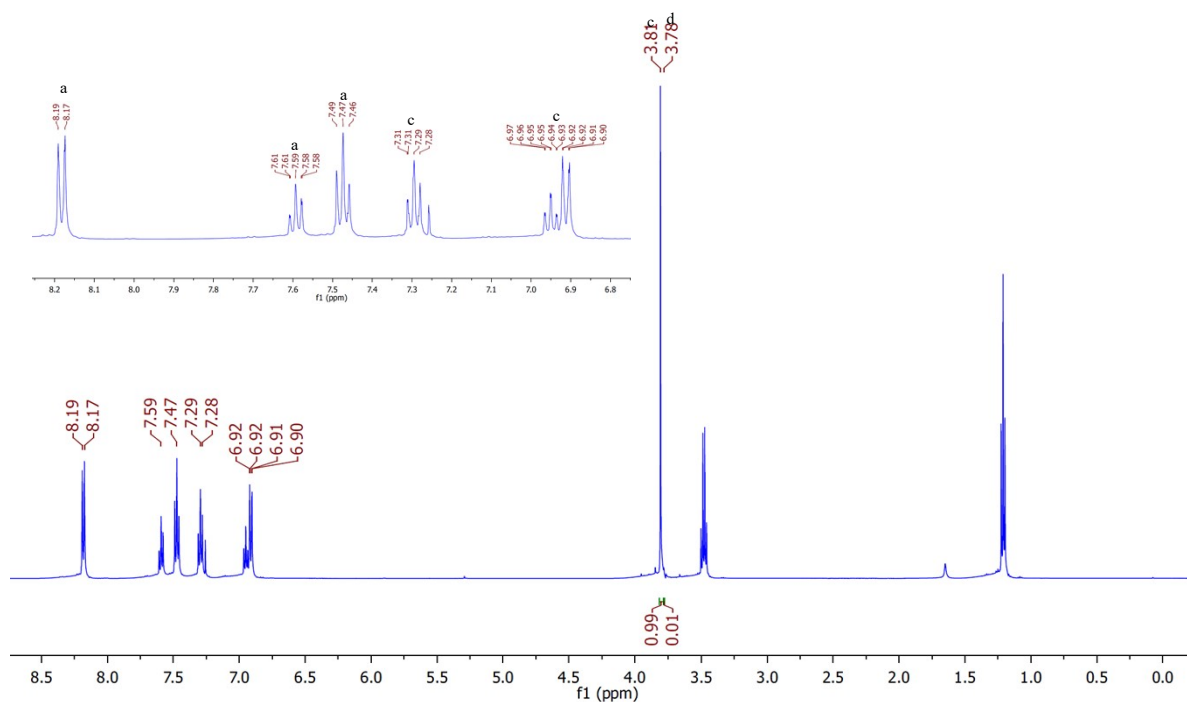

Figure S15.  $^1\text{H}$  NMR spectrum of  $\text{PhICl}_2$ , anisole and 20%  $\text{HCl}\cdot\text{Et}_2\text{O}$  at  $t = 1$  hour in  $\text{CDCl}_3$ .

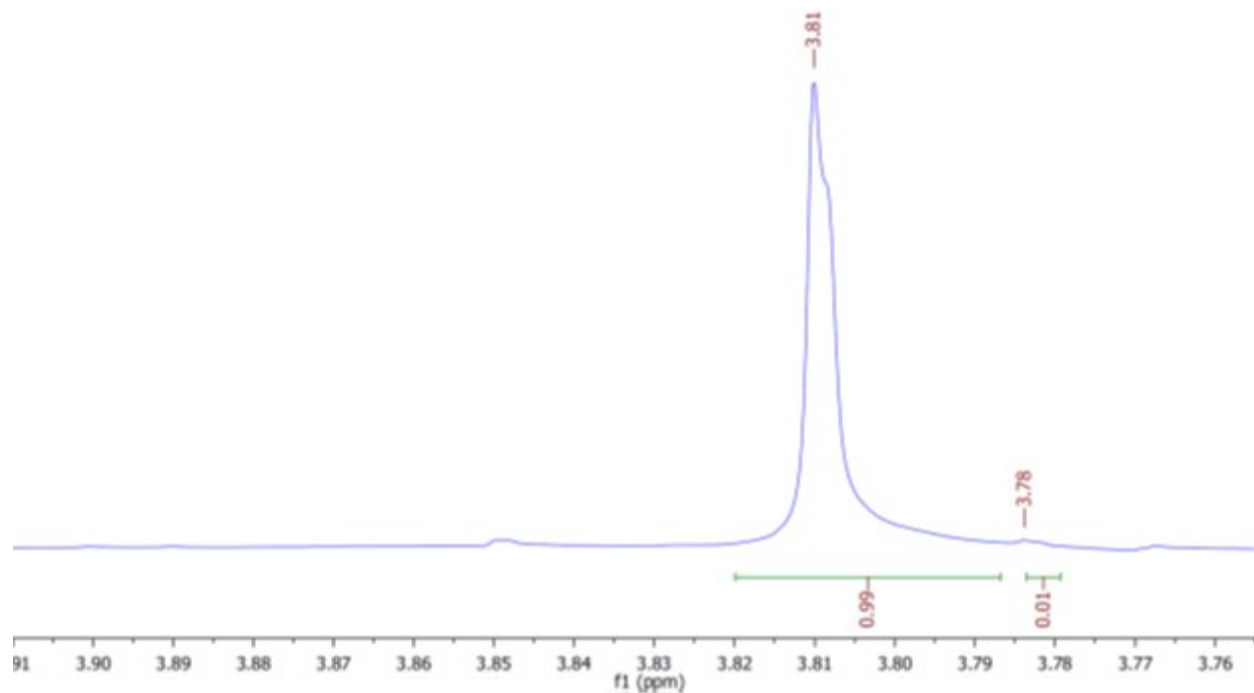

Figure S16. Methyl region  $^1\text{H}$  NMR spectrum of  $\text{PhICl}_2$ , anisole and 20%  $\text{HCl}.\text{Et}_2\text{O}$  at  $t = 1$  hour in  $\text{CDCl}_3$  showing normalised integrals for anisole methyl (3.81 ppm), 2-chloroanisole methyl (3.90 ppm) and 4-chloroanisole methyl (3.78 ppm) protons.

h.  $\text{PhICl}_2 + \text{NBu}_4\text{OTf}$  (20%)

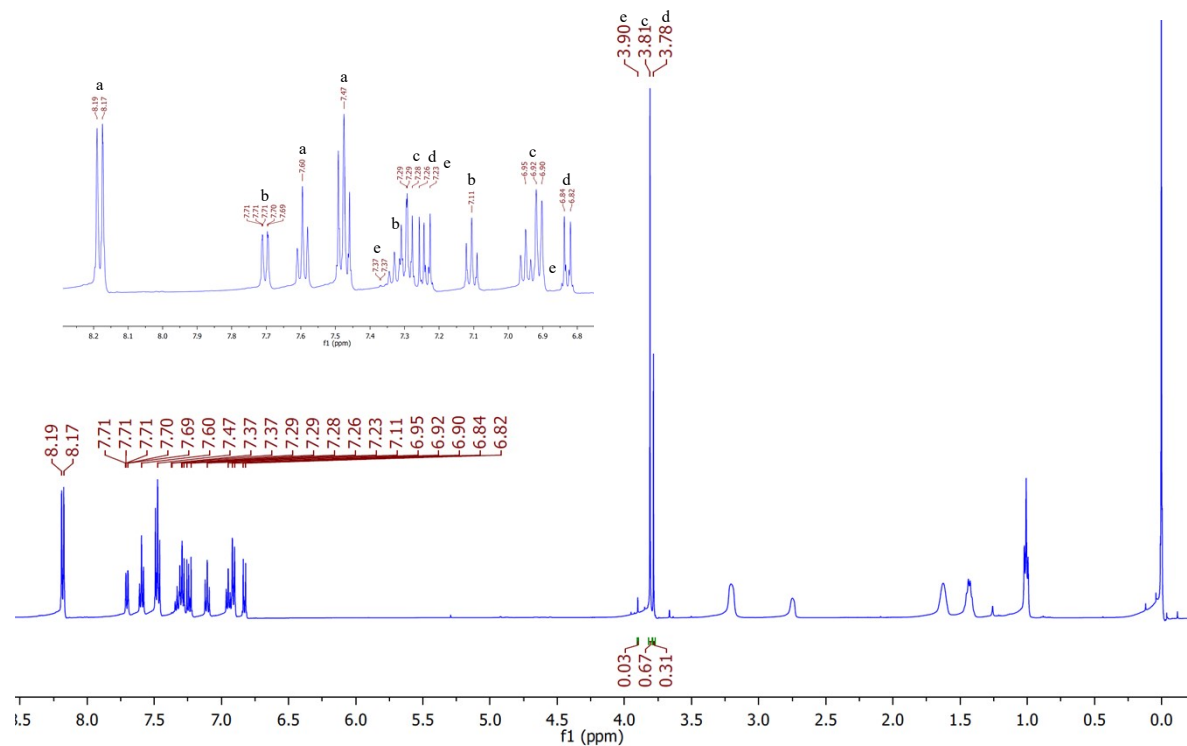

Figure S17.  $^1\text{H}$  NMR spectrum of  $\text{PhICl}_2$ , anisole and 20%  $\text{NBu}_4\text{OTf}$  at  $t = 1$  hour in  $\text{CDCl}_3$ .

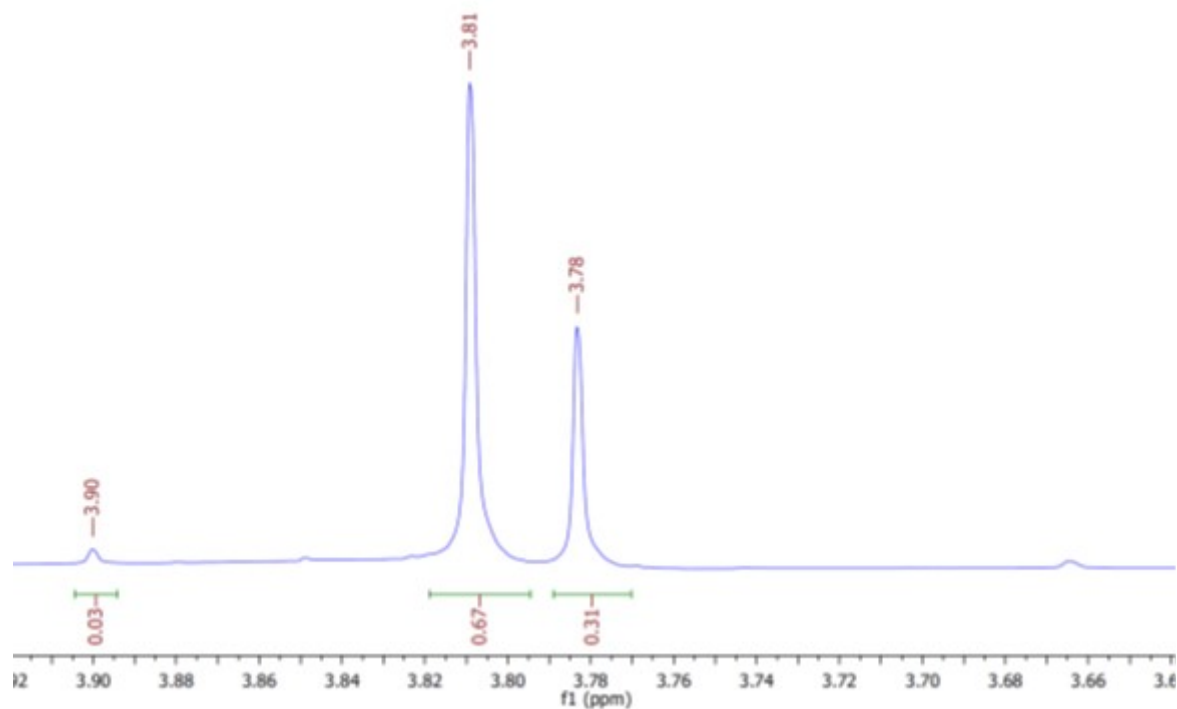

Figure S18. Methyl region  $^1\text{H}$  NMR spectrum of  $\text{PhICl}_2$ , anisole and 20%  $\text{NBu}_4\text{OTf}$  at  $t = 1$  hour in  $\text{CDCl}_3$  showing normalised integrals for anisole methyl (3.81 ppm), 2-chloroanisole methyl (3.90 ppm) and 4-chloroanisole methyl (3.78 ppm) protons.

i.  $\text{PhICl}_2 + 4\text{-DMAP}$  (20%)

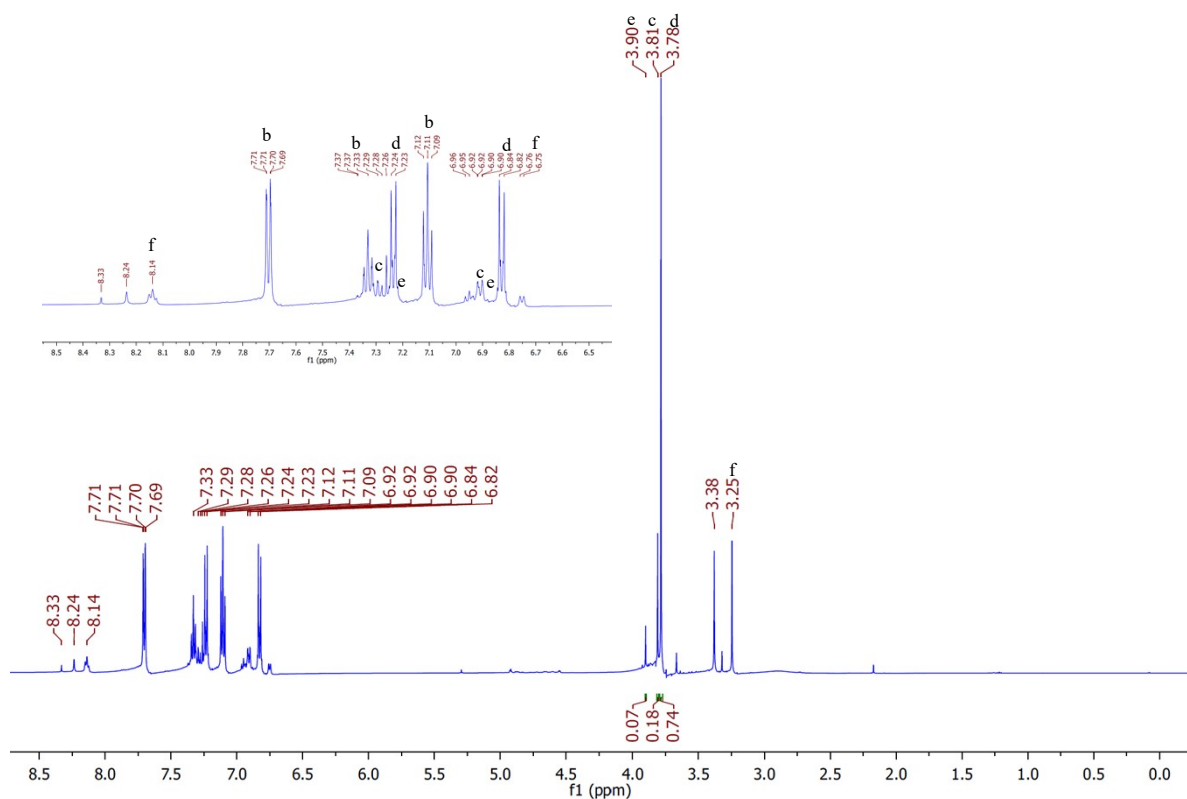

Figure S19.  $^1\text{H}$  NMR spectrum of  $\text{PhICl}_2$ , anisole and 20% 4-DMAP at  $t = 1$  hour in  $\text{CDCl}_3$ .



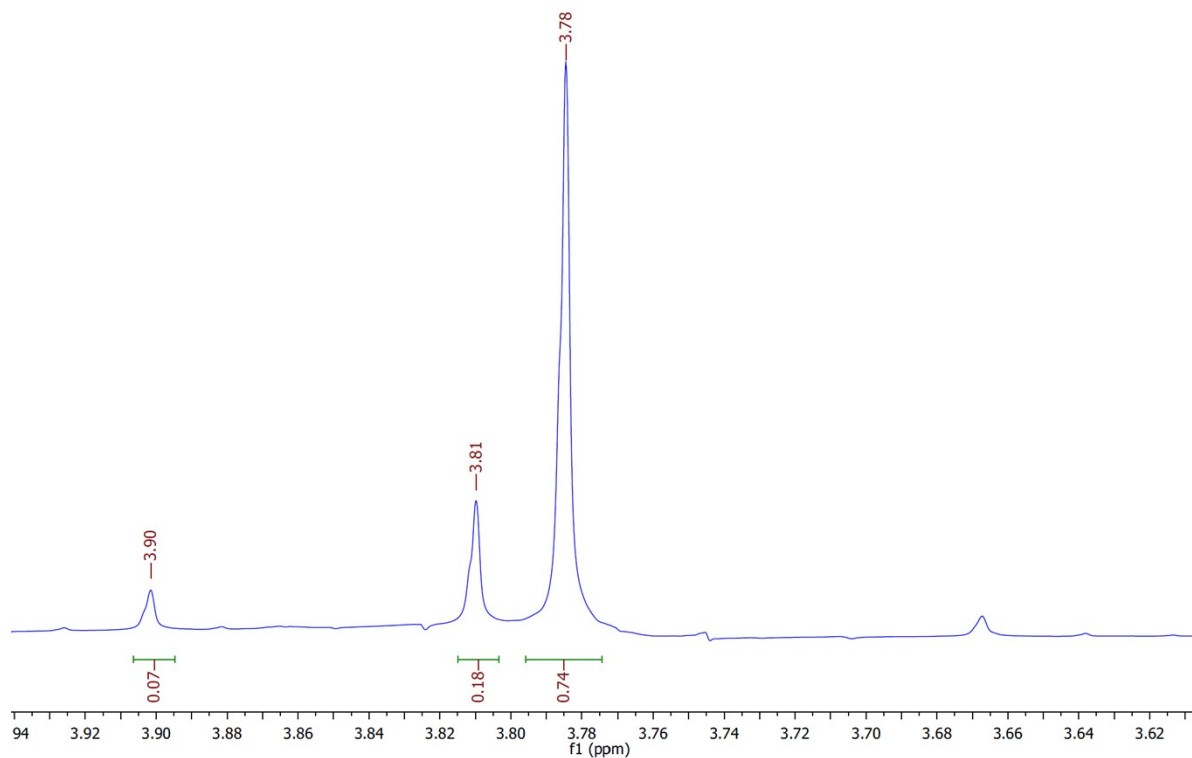

Figure S20. Methyl region  $^1\text{H}$  NMR spectrum of  $\text{PhICl}_2$ , anisole and 20% 4-DMAP at  $t = 1$  hour in  $\text{CDCl}_3$  showing normalised integrals for anisole methyl (3.81 ppm), 2-chloroanisole methyl (3.90 ppm) and 4-chloroanisole methyl (3.78 ppm) protons.

j.  $\text{PhICl}_2 + 4\text{-DMAP.HCl}$  (20%)

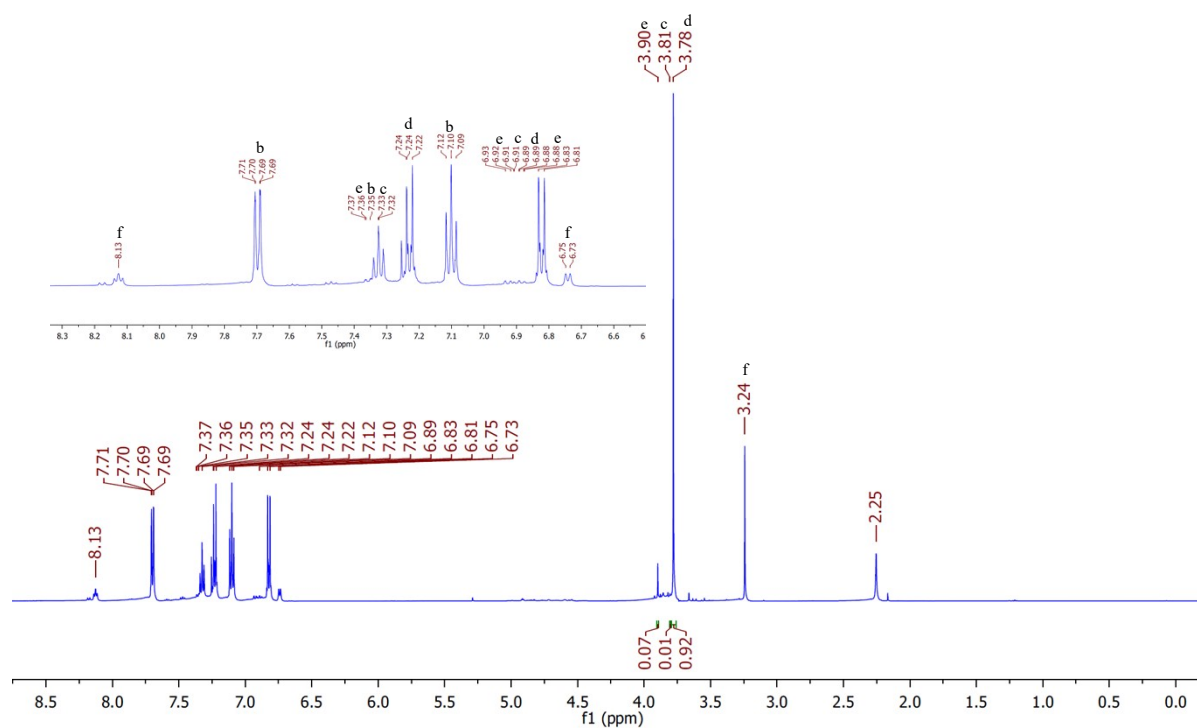

Figure S21.  $^1\text{H}$  NMR spectrum of  $\text{PhICl}_2$ , anisole and 20% 4-DMAP.HCl at  $t = 1$  hour in  $\text{CDCl}_3$ .

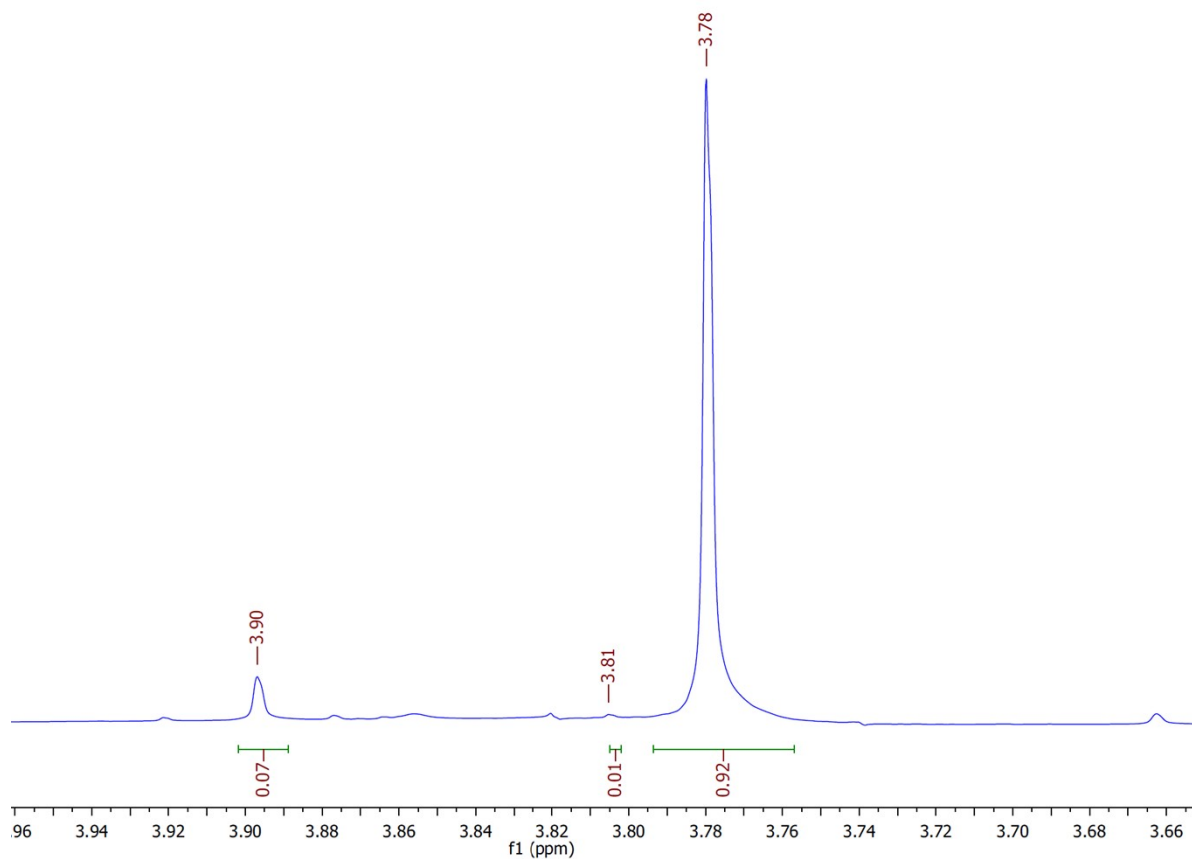

Figure S22. Methyl region  $^1\text{H}$  NMR spectrum of  $\text{PhICl}_2$ , anisole and 20% 4-DMAP.HCl at  $t = 1$  hour in  $\text{CDCl}_3$  showing normalised integrals for anisole methyl (3.81 ppm), 2-chloroanisole methyl (3.90 ppm) and 4-chloroanisole methyl (3.78 ppm) protons.

k.  $\text{PhICl}_2 + 4\text{-DMAP.HOTf}$  (20%)

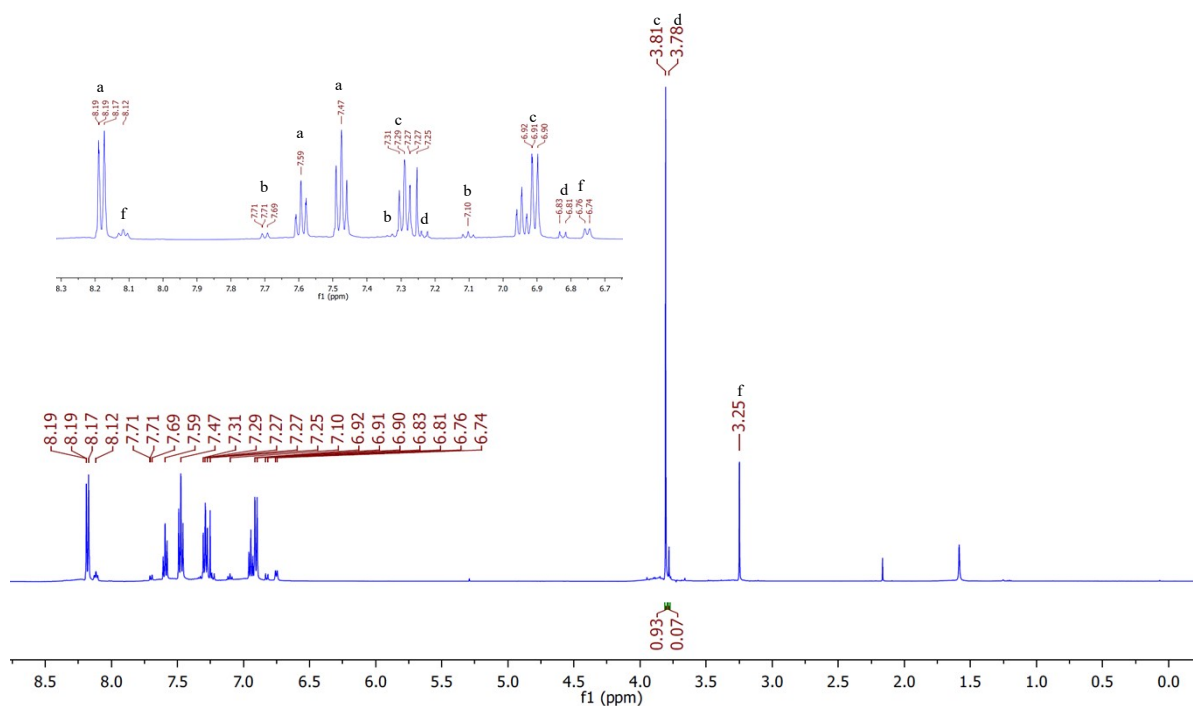

Figure S23.  $^1\text{H}$  NMR spectrum of  $\text{PhICl}_2$ , anisole and 20% 4-DMAP.HOTf at  $t = 1$  hour in  $\text{CDCl}_3$ .

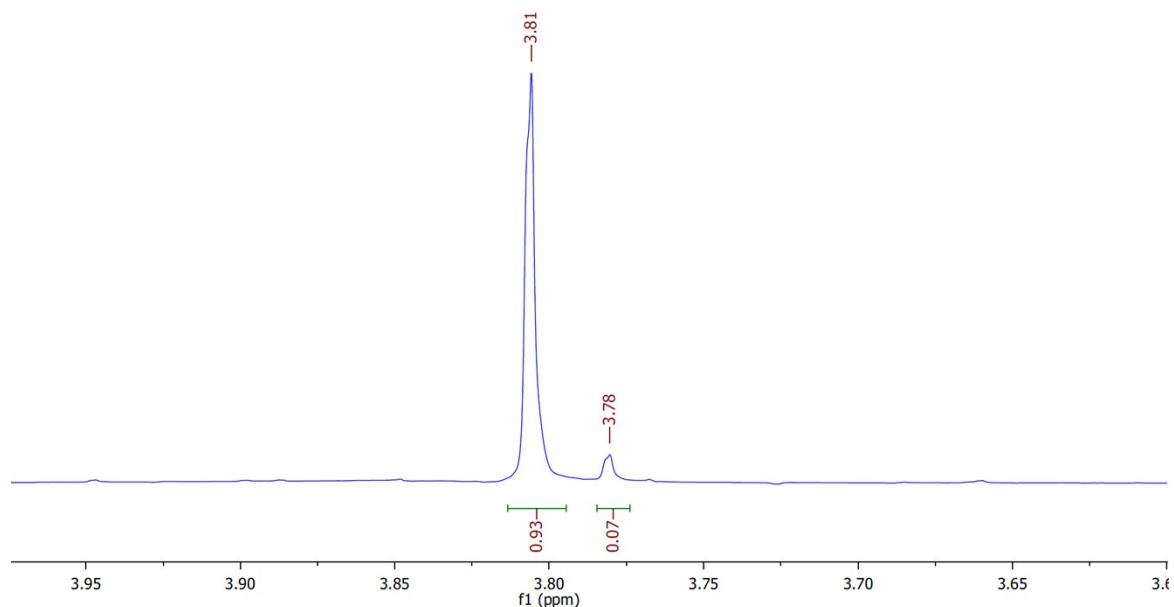

Figure S24. Methyl region <sup>1</sup>H NMR spectrum of PhICl<sub>2</sub>, anisole and 20% 4-DMAP.HOTf at t = 1 hour in CDCl<sub>3</sub> showing normalised integrals for anisole methyl (3.81 ppm), 2-chloroanisole methyl (3.90 ppm) and 4-chloroanisole methyl (3.78 ppm) protons.

1. PhICl<sub>2</sub> + 3-Cl-4-DMAP (20%)

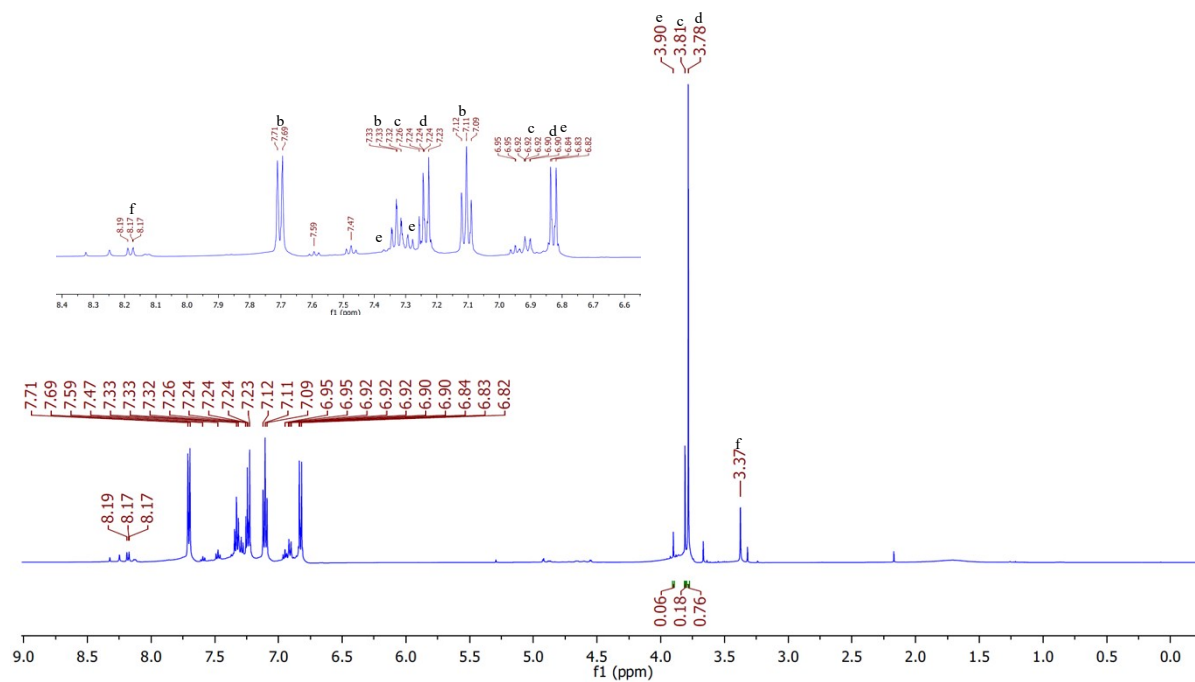

Figure S25. <sup>1</sup>H NMR spectrum of PhICl<sub>2</sub>, anisole and 20% 3-Cl-4-DMAP at t = 1 hour in CDCl<sub>3</sub>.

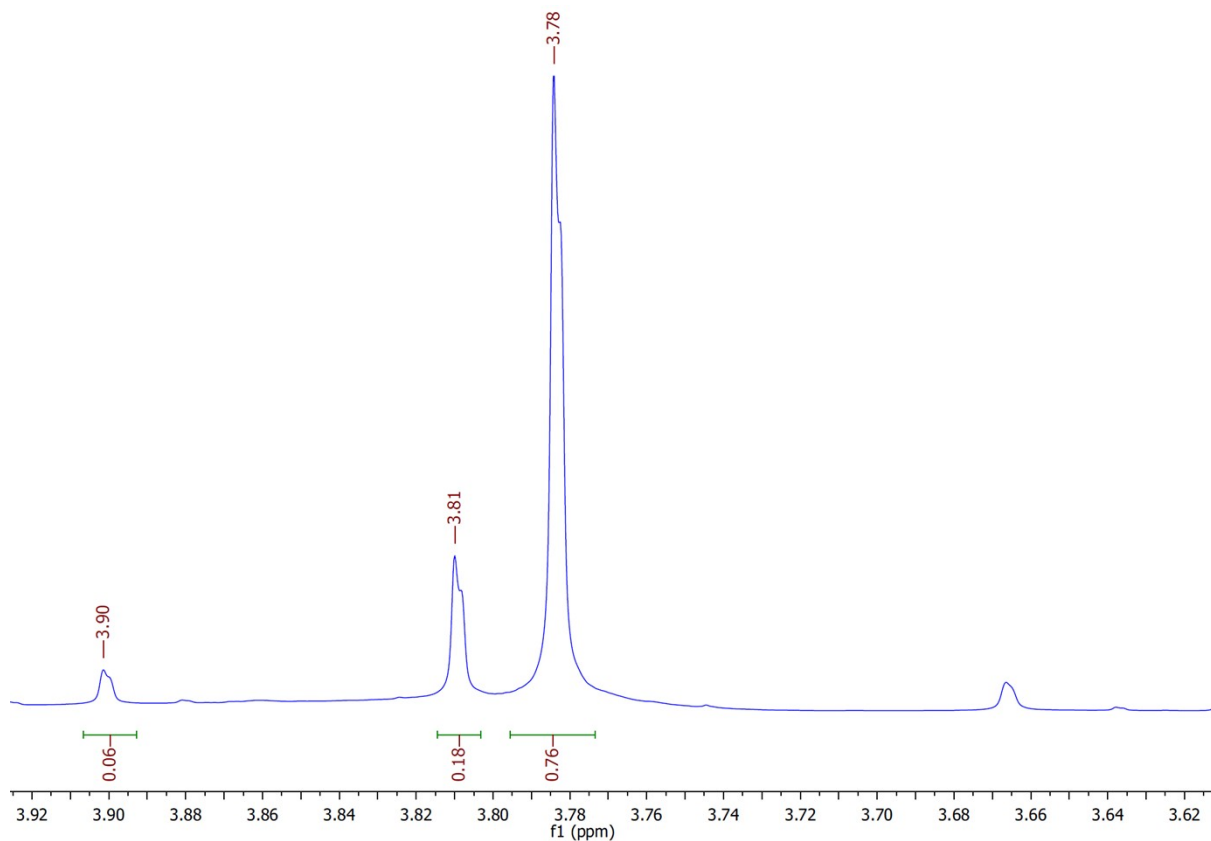

m.  $\text{PhICl}_2 + 3\text{-Cl-4-DMAP.HCl}$  (20%)

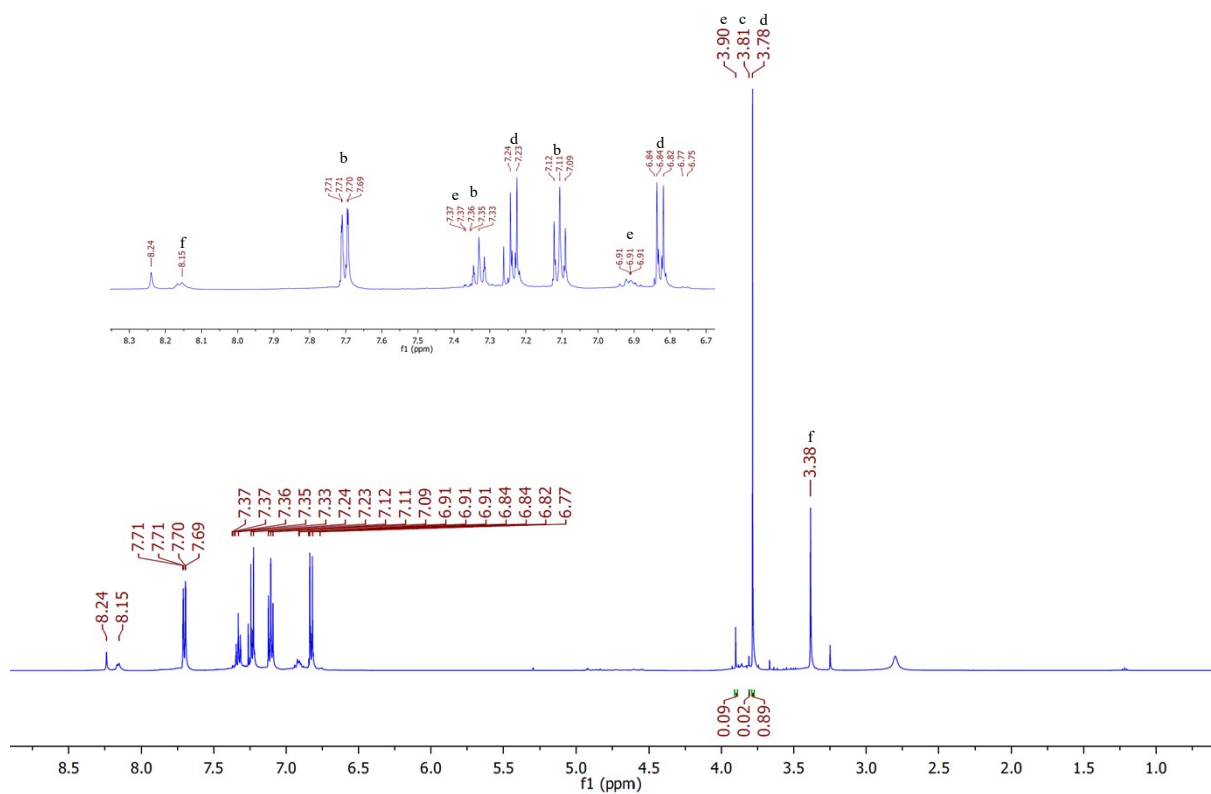

Figure S27.  $^1\text{H}$  NMR spectrum of  $\text{PhICl}_2$ , anisole and 20% 3-Cl-4-DMAP.HCl at  $t = 1$  hour in  $\text{CDCl}_3$ .

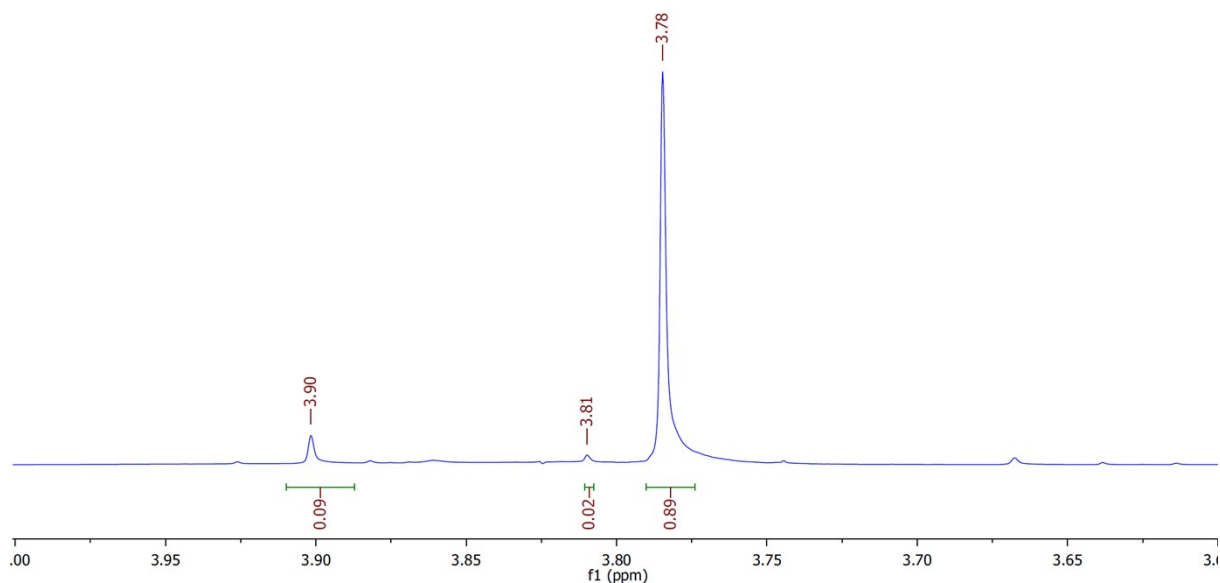

Figure S28. Methyl region  $^1\text{H}$  NMR spectrum of  $\text{PhICl}_2$ , anisole and 20% 3-Cl-4-DMAP.HCl at  $t = 1$  hour in  $\text{CDCl}_3$  showing normalised integrals for anisole methyl (3.81 ppm), 2-chloroanisole methyl (3.90 ppm) and 4-chloroanisole methyl (3.78 ppm) protons.

n.  $\text{PhICl}_2 + \text{NBu}_4\text{Cl}$  (5%)

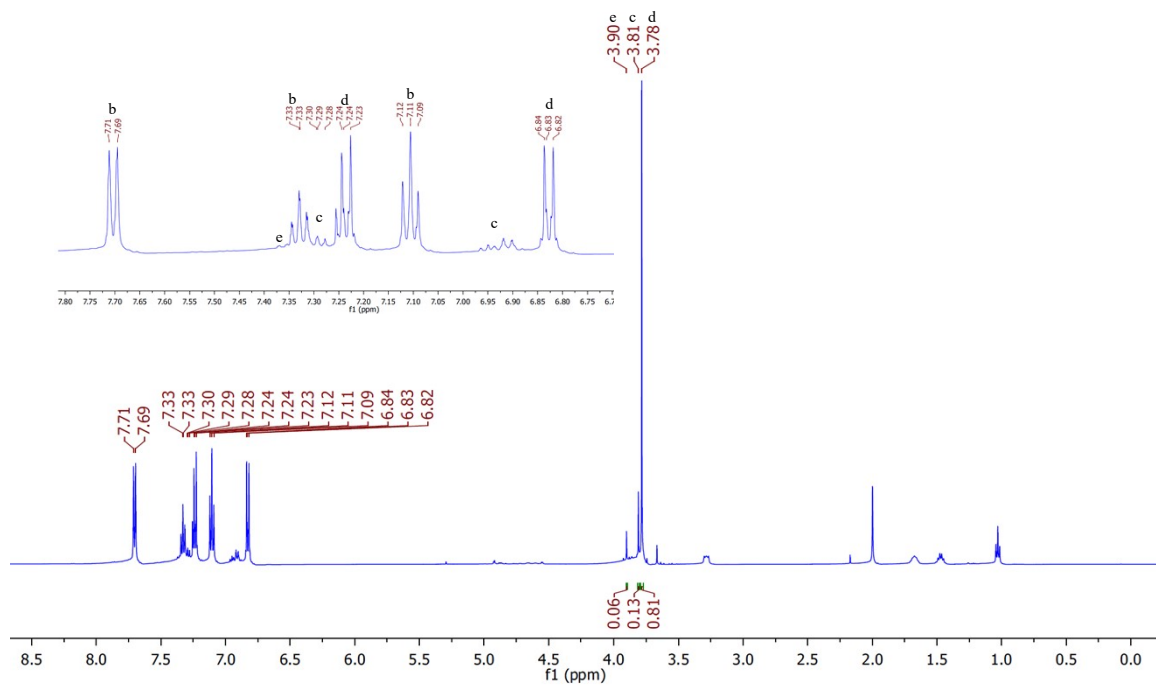

Figure S29.  $^1\text{H}$  NMR spectrum of  $\text{PhICl}_2$ , anisole and 5%  $\text{NBu}_4\text{Cl}$  at  $t = 1$  hour in  $\text{CDCl}_3$ .

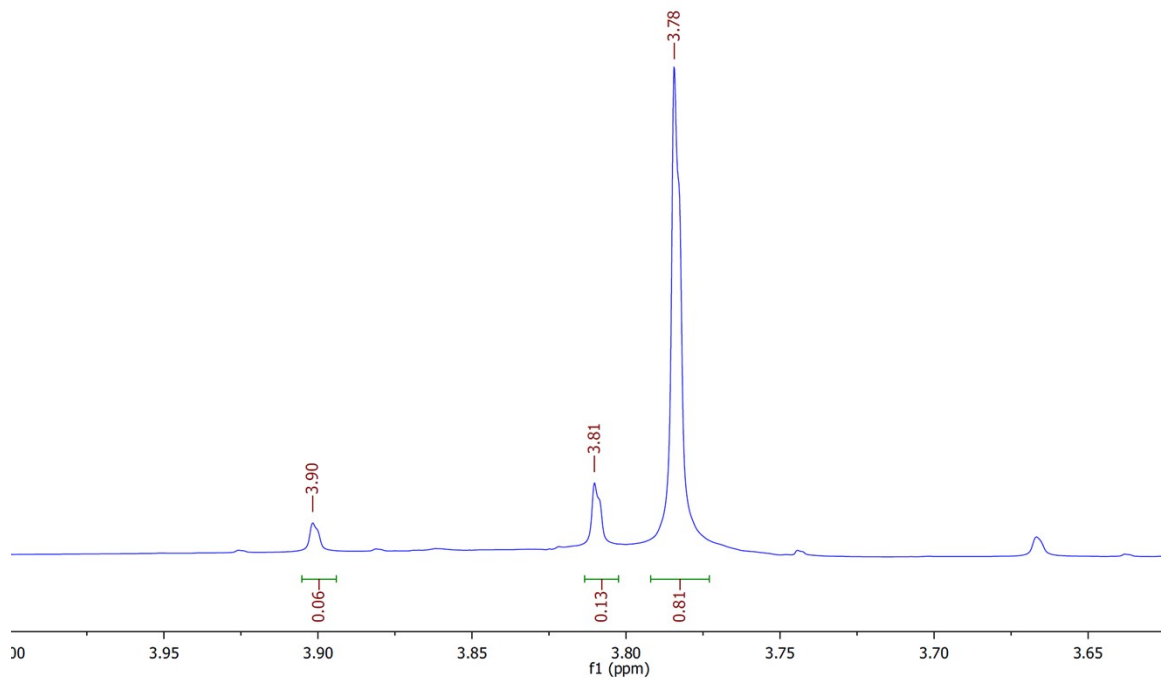

Figure S30. Methyl region  $^1\text{H}$  NMR spectrum of  $\text{PhICl}_2$ , anisole and 5%  $\text{NBu}_4\text{Cl}$  at  $t = 1$  hour in  $\text{CDCl}_3$  showing normalised integrals for anisole methyl (3.81 ppm), 2-chloroanisole methyl (3.90 ppm) and 4-chloroanisole methyl (3.78 ppm) protons.

o.  $\text{PhICl}_2 + \text{NaCl}$  (20%)

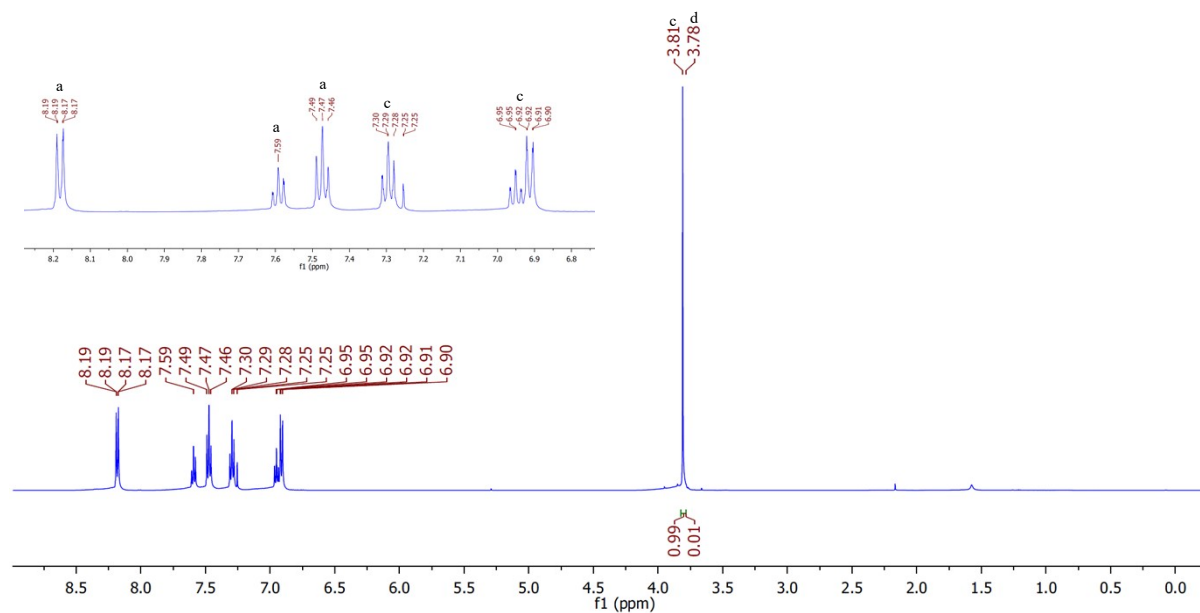

Figure S31.  $^1\text{H}$  NMR spectrum of  $\text{PhICl}_2$ , anisole and 20%  $\text{NaCl}$  at  $t = 1$  hour in  $\text{CDCl}_3$ .

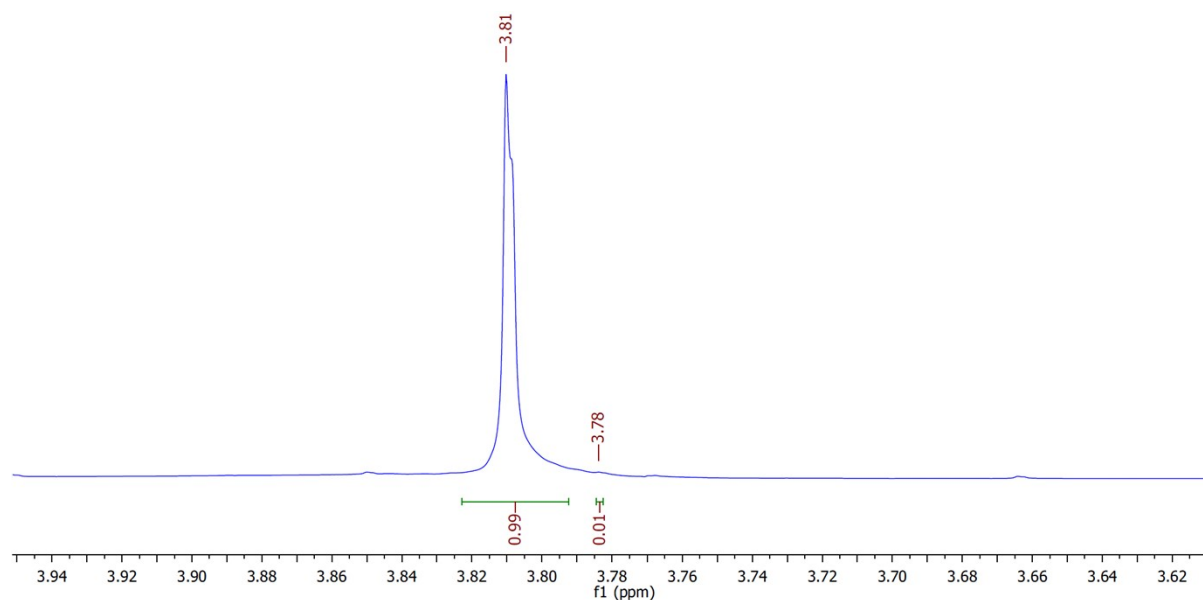

Figure S32. Methyl region  $^1\text{H}$  NMR spectrum of  $\text{PhICl}_2$ , anisole and 20%  $\text{NaCl}$  at  $t = 1$  hour in  $\text{CDCl}_3$  showing normalised integrals for anisole methyl (3.81 ppm), 2-chloroanisole methyl (3.90 ppm) and 4-chloroanisole methyl (3.78 ppm) protons.

p.  $\text{PhICl}_2 + \text{LiCl}$  (20%)

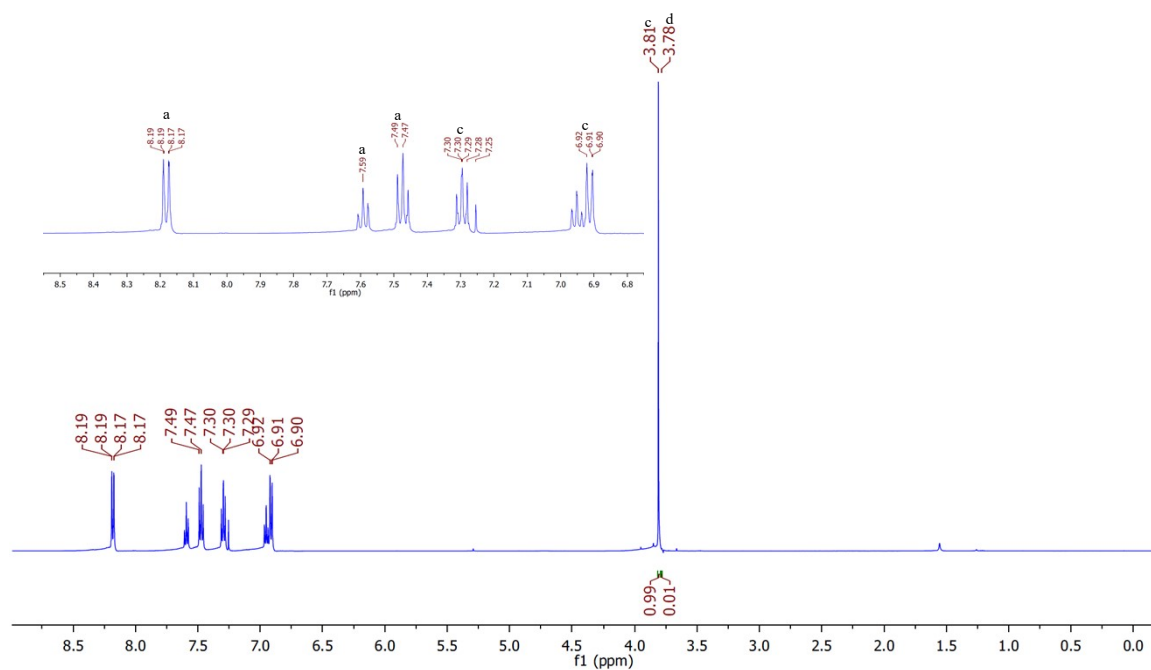

Figure S33.  $^1\text{H}$  NMR spectrum of  $\text{PhICl}_2$ , anisole and 20%  $\text{LiCl}$  at  $t = 1$  hour in  $\text{CDCl}_3$ .

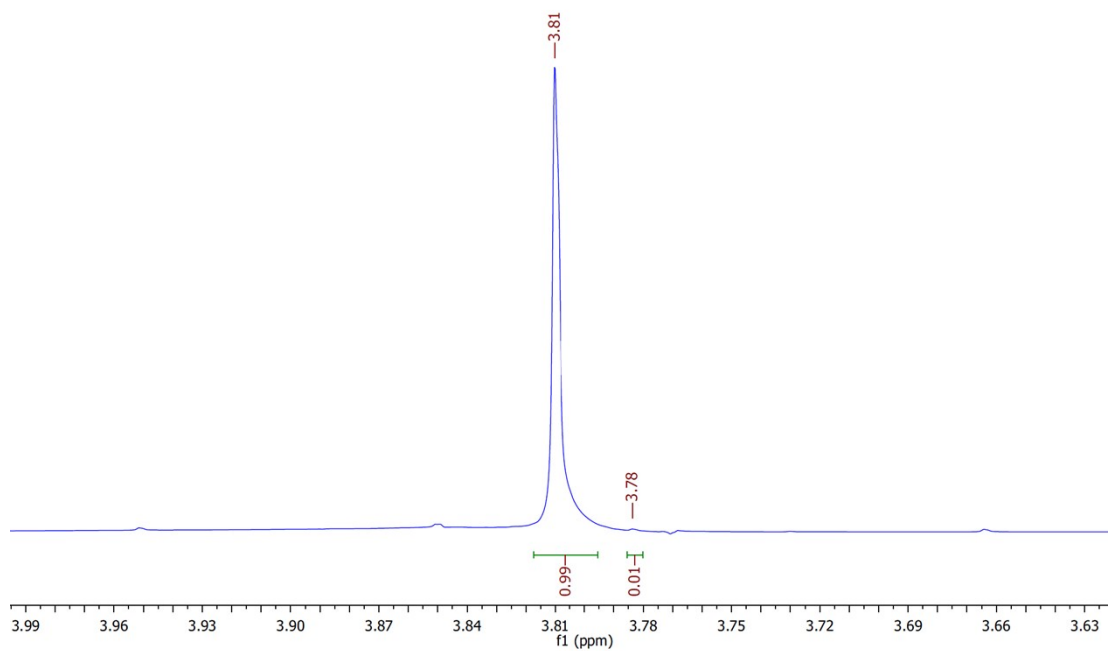

Figure S34. Methyl region <sup>1</sup>H NMR spectrum of PhICl<sub>2</sub>, anisole and 20% LiCl at t = 1 hour in CDCl<sub>3</sub> showing normalised integrals for anisole methyl (3.81 ppm), 2-chloroanisole methyl (3.90 ppm) and 4-chloroanisole methyl (3.78 ppm) protons.

q. PhICl<sub>2</sub> + LiCl (50%)

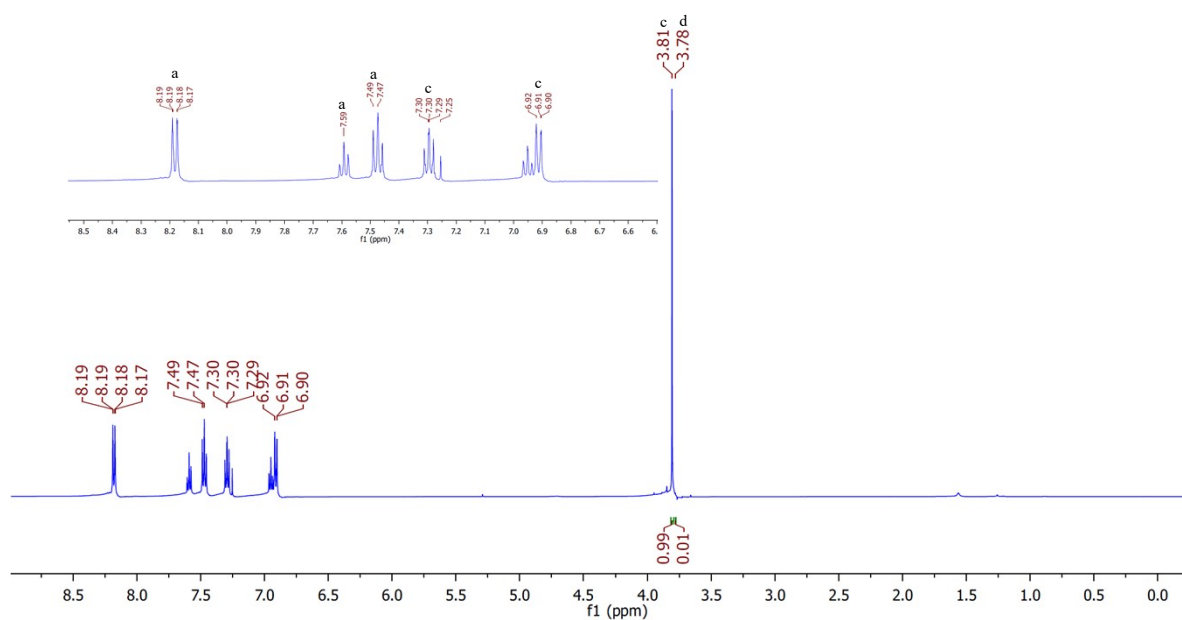

Figure S35. <sup>1</sup>H NMR spectrum of PhICl<sub>2</sub>, anisole and 50% LiCl at t = 1 hour in CDCl<sub>3</sub>.



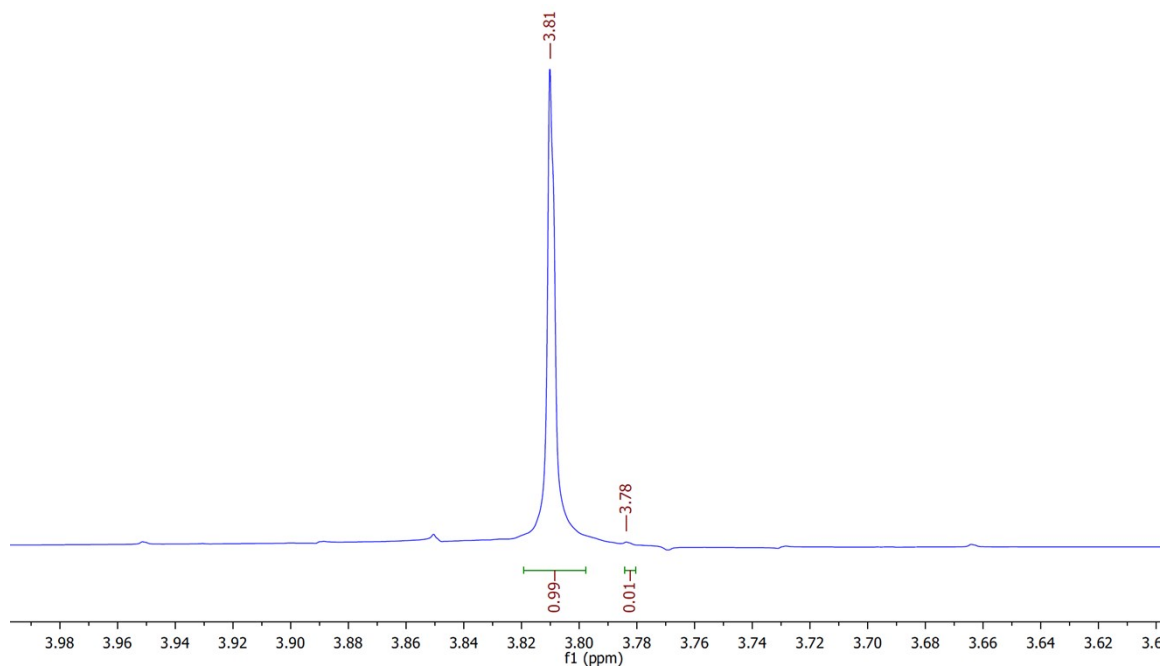

Figure S36. Methyl region  $^1\text{H}$  NMR spectrum of  $\text{PhICl}_2$ , anisole and 50%  $\text{LiCl}$  at  $t = 1$  hour in  $\text{CDCl}_3$  showing normalised integrals for anisole methyl (3.81 ppm), 2-chloroanisole methyl (3.90 ppm) and 4-chloroanisole methyl (3.78 ppm) protons.

ii. Decomposition of  $\text{PhICl}_2$

a.  $\text{PhICl}_2$  only

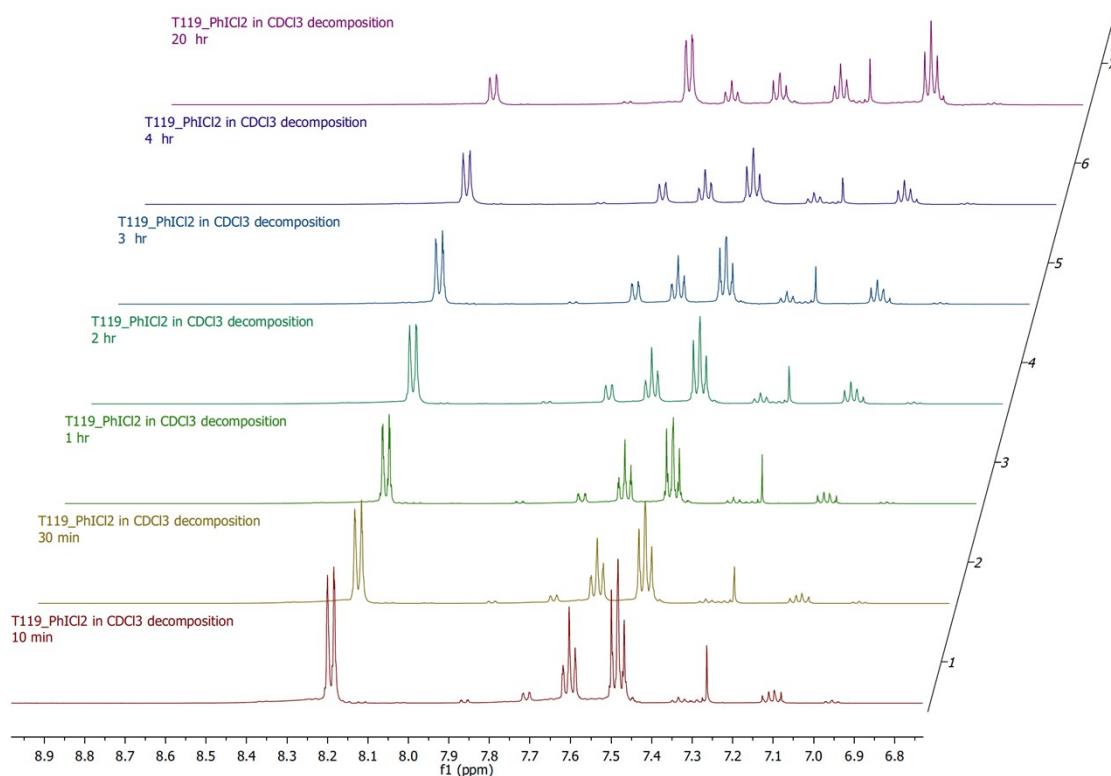

Figure S37.  $^1\text{H}$  NMR spectra overlay for  $\text{PhICl}_2$  in  $\text{CDCl}_3$  at  $t = 10$  min (red), 30 min (yellow), 1 hr (green), 2 hrs (cyan), 3 hrs (blue), 4 hrs (violet) and 20 hrs (magenta).

b.  $\text{PhICl}_2 + \text{Pyridine}$  (20%)

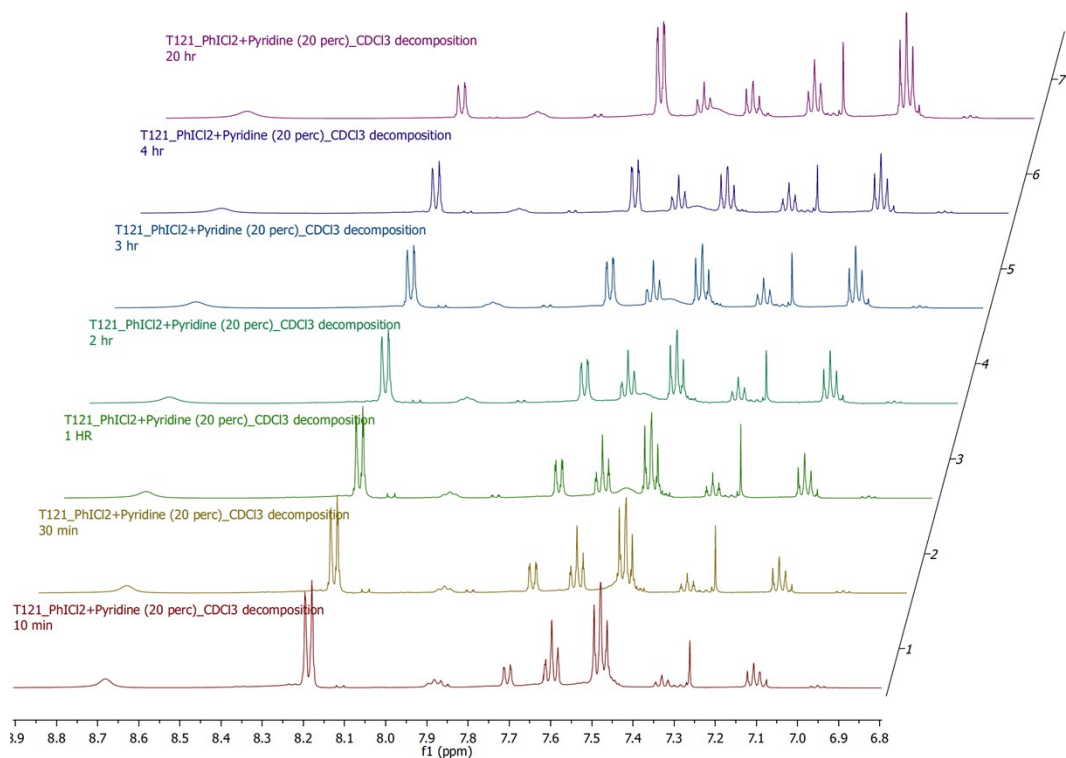

Figure S38. <sup>1</sup>H NMR spectra for PhICl<sub>2</sub> and 20% pyridine in CDCl<sub>3</sub> at t = 10 min (red), 30 min (yellow), 1 hr (green), 2 hrs (cyan), 3 hrs (blue), 4 hrs (violet) and 20 hrs (magenta).  
c. PhICl<sub>2</sub> + Pyridine.HCl (20%)

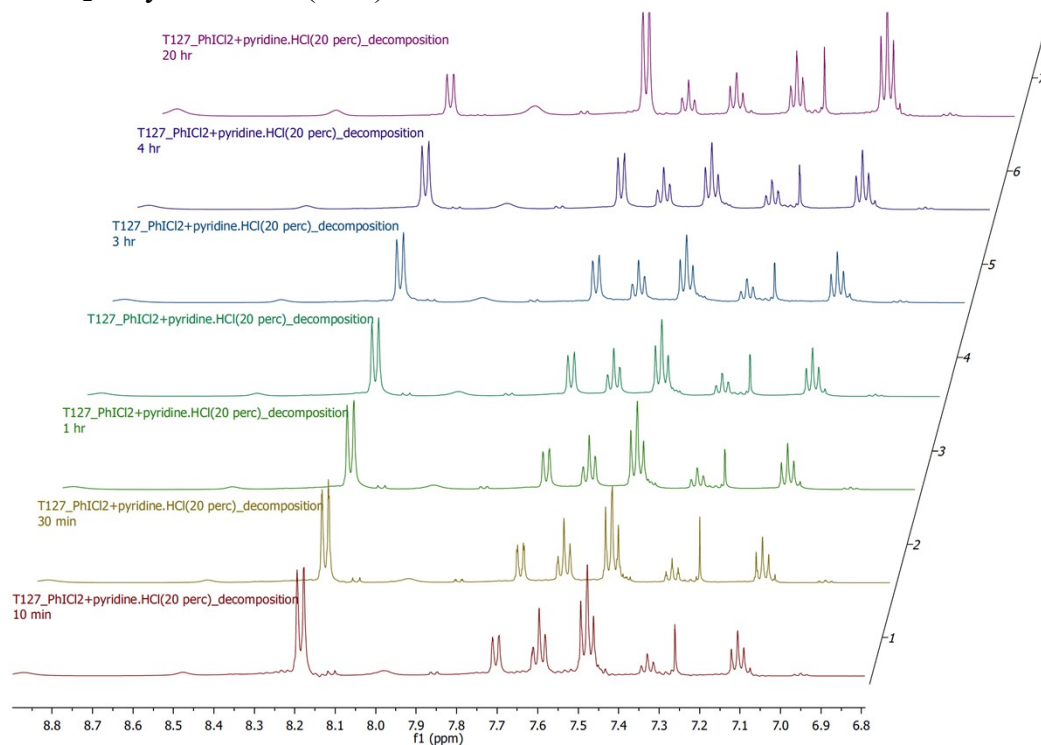

Figure S39. <sup>1</sup>H NMR spectra for PhICl<sub>2</sub> and 20% pyridine.HCl in CDCl<sub>3</sub> at t = 10 min (red), 30 min (yellow), 1 hr (green), 2 hrs (cyan), 3 hrs (blue), 4 hrs (violet) and 20 hrs (magenta).

d. PhICl<sub>2</sub> + Pyridine.HOTf (20%)

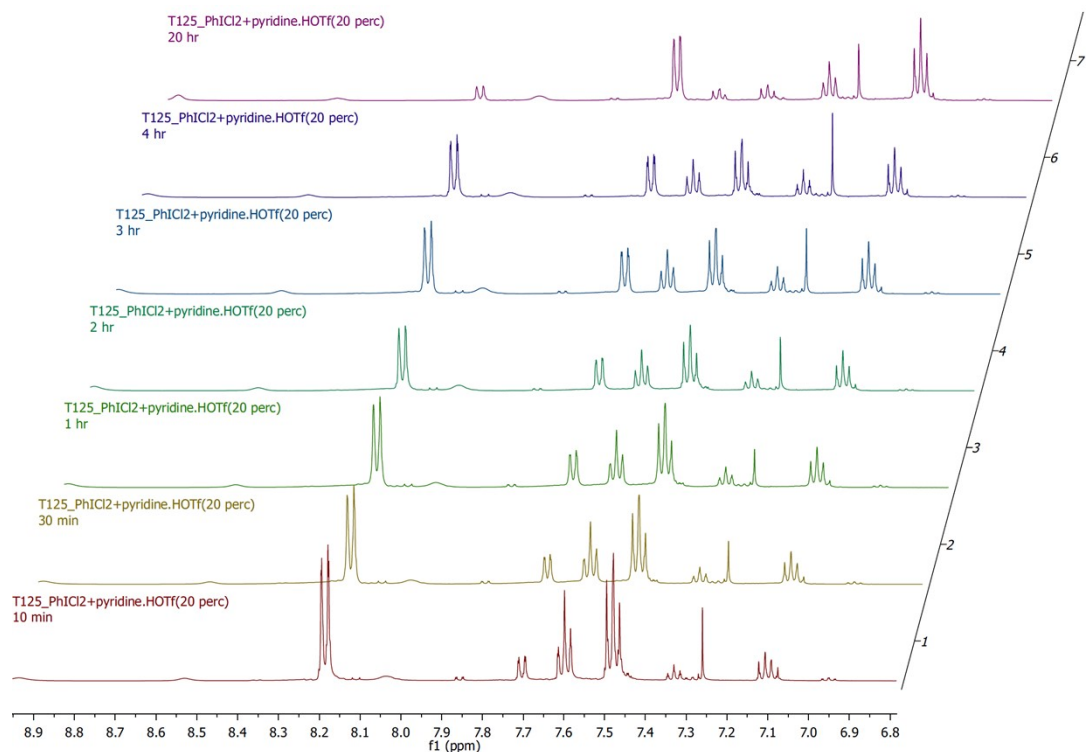

Figure S40.  $^1\text{H}$  NMR spectra for  $\text{PhICl}_2$  and 20% pyridine.HOTf in  $\text{CDCl}_3$  at  $t = 10$  min (red), 30 min (yellow), 1 hr (green), 2 hrs (cyan), 3 hrs (blue), 4 hrs (violet) and 20 hrs (magenta).

e.  $\text{PhICl}_2 + \text{NBu}_4\text{Cl}$  (20%)

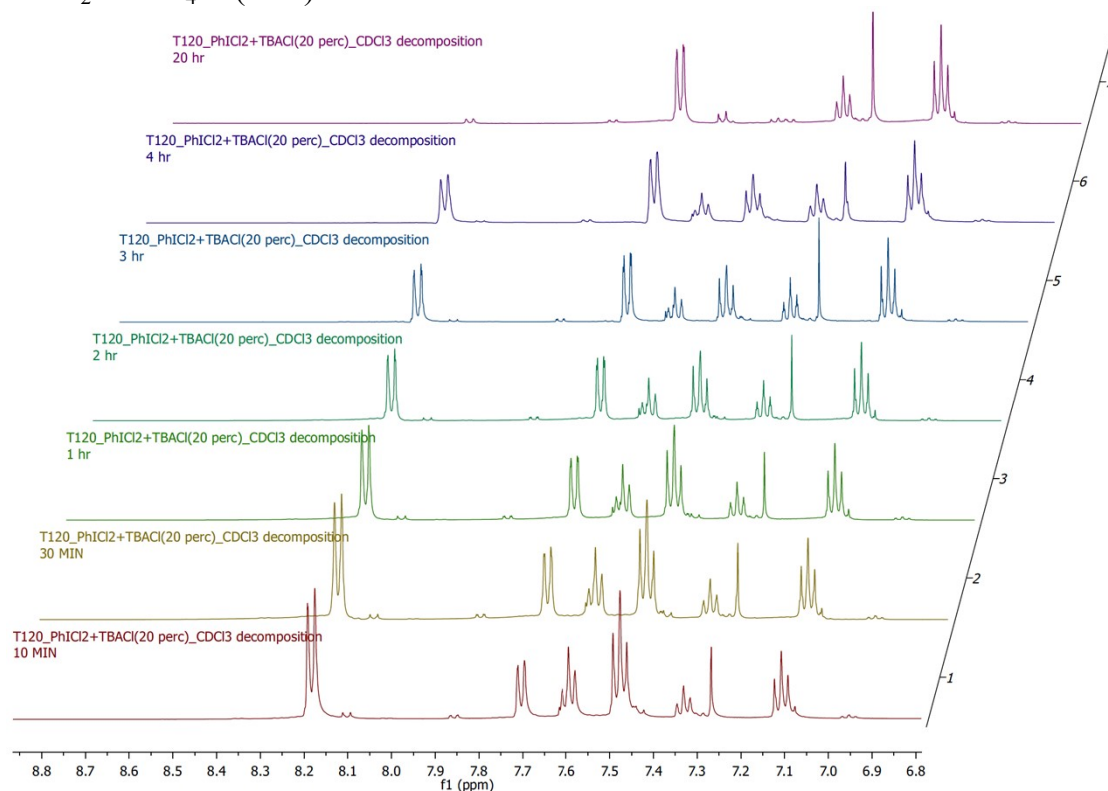

Figure S41.  $^1\text{H}$  NMR spectra for  $\text{PhICl}_2$  and 20%  $\text{NBu}_4\text{Cl}$  in  $\text{CDCl}_3$  at  $t = 10$  min (red), 30 min (yellow), 1 hr (green), 2 hrs (cyan), 3 hrs (blue), 4 hrs (violet) and 20 hrs (magenta).

f.  $\text{PhICl}_2 + \text{HCl} \cdot \text{Et}_2\text{O}$  (20%)

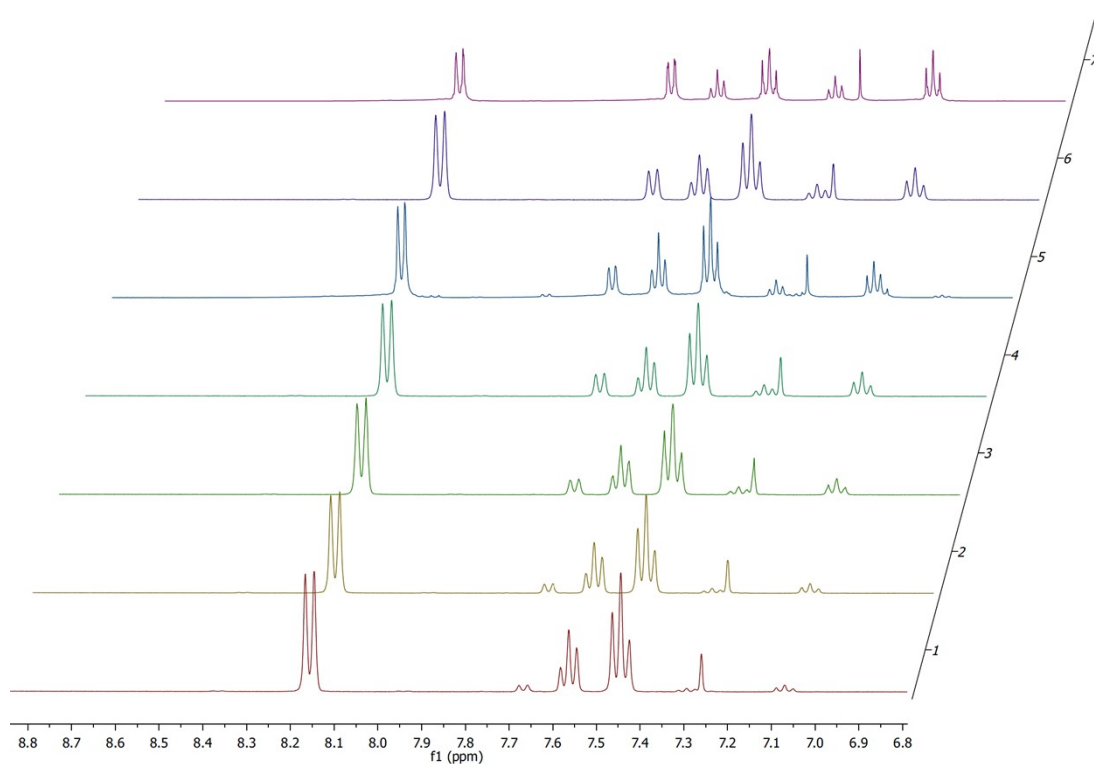

Figure S42.  $^1\text{H}$  NMR spectra for  $\text{PhICl}_2$  and 20%  $\text{HCl.Et}_2\text{O}$  in  $\text{CDCl}_3$  at  $t = 10$  min (red), 30 min (yellow), 1 hr (green), 2 hrs (cyan), 3 hrs (blue), 4 hrs (violet) and 20 hrs (magenta).

g.  $\text{PhICl}_2 + \text{NBu}_4\text{OTf}$  (20%)

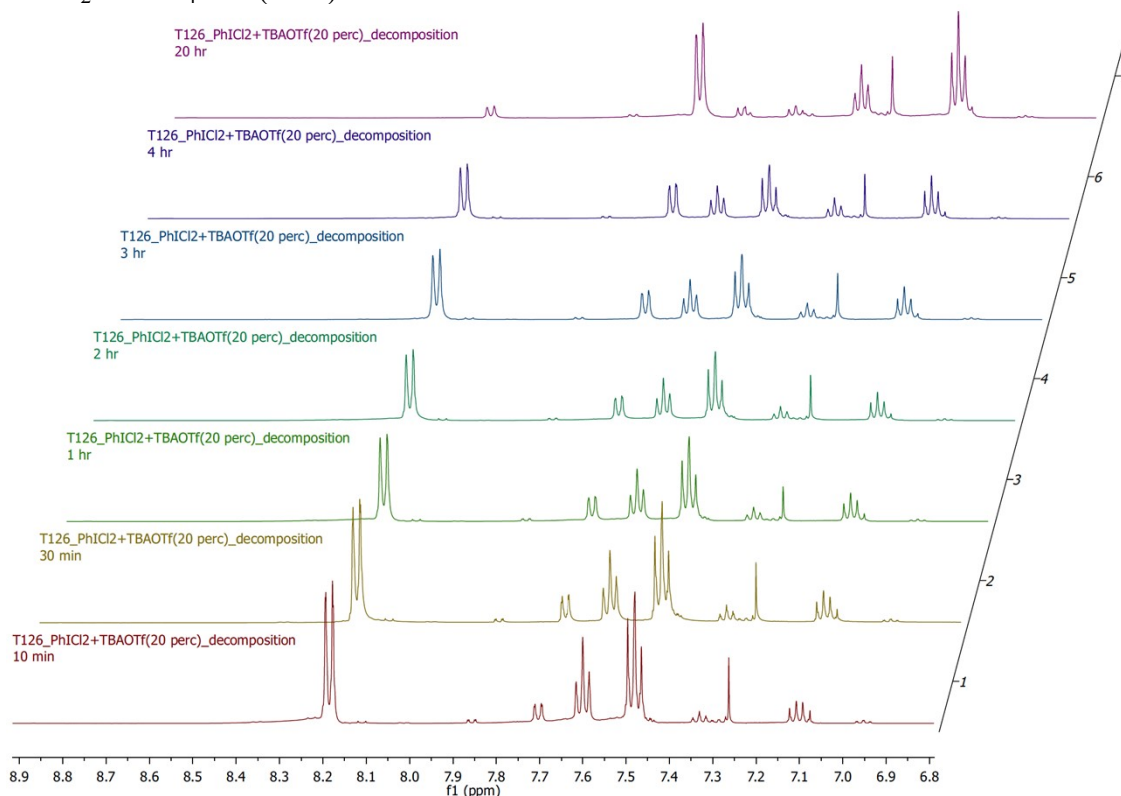

Figure S43.  $^1\text{H}$  NMR spectra for  $\text{PhICl}_2$  and 20%  $\text{NBu}_4\text{OTf}$  in  $\text{CDCl}_3$  at  $t = 10$  min (red), 30 min (yellow), 1 hr (green), 2 hrs (cyan), 3 hrs (blue), 4 hrs (violet) and 20 hrs (magenta).

h.  $\text{PhICl}_2 + \text{LiCl}$  (20%)

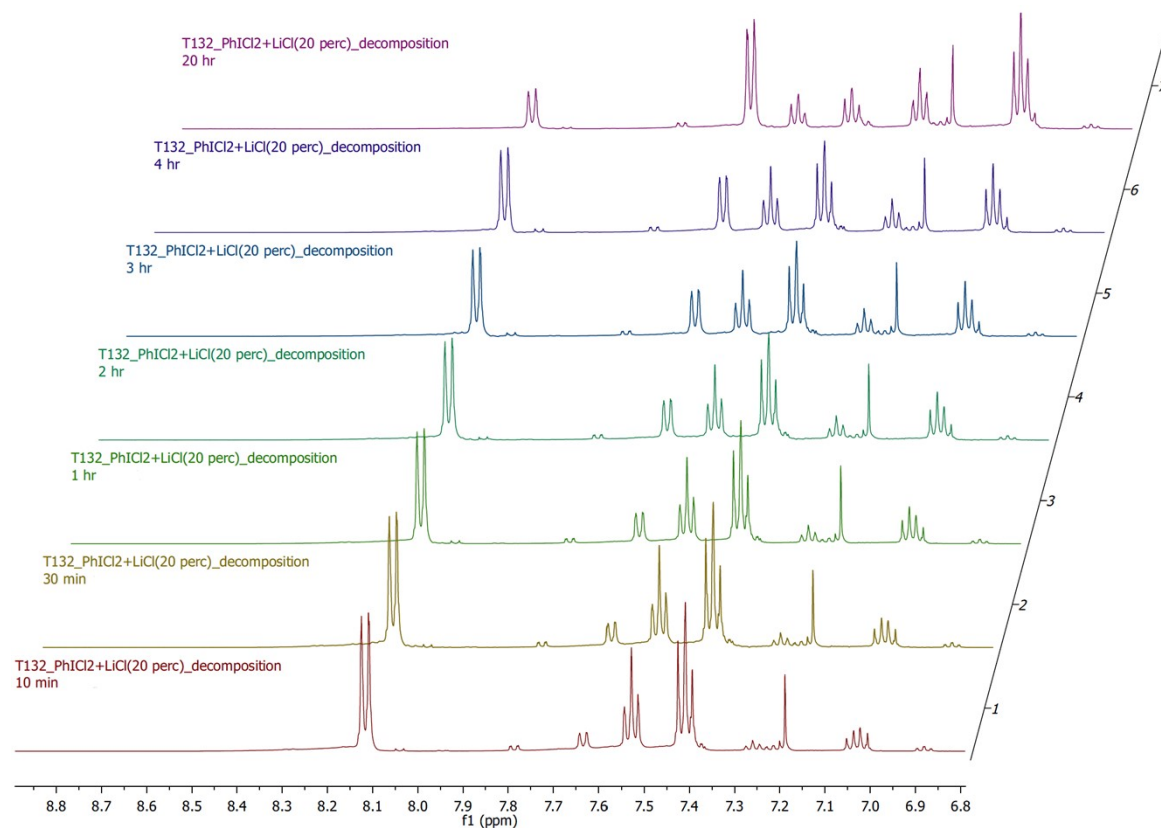

Figure S44.  $^1\text{H}$  NMR spectra for  $\text{PhICl}_2$  and 20%  $\text{LiCl}$  in  $\text{CDCl}_3$  at  $t = 10$  min (red), 30 min (yellow), 1 hr (green), 2 hrs (cyan), 3 hrs (blue), 4 hrs (violet) and 20 hrs (magenta).

iii. BindFit experiment

a.  $\text{PhICl}_2 + \text{NBu}_4\text{Cl}$  (20%)

Link: <http://app.supramolecular.org/bindfit/view/7dbfd70a-44d3-43da-9974-49dc3782779e>

Table S5. Excel data used for BindFit experiment.

| Host concentration / M | Guest concentration / M | Proton 1 | Proton 2 | Proton 3 |
|------------------------|-------------------------|----------|----------|----------|
| 2.20E-02               | 0.037                   | 8.164    | 7.572    | 7.456    |
| 2.00E-02               | 0.074                   | 8.123    | 7.530    | 7.418    |
| 1.40E-02               | 0.111                   | 8.092    | 7.499    | 7.390    |
| 1.50E-02               | 0.148                   | 8.060    | 7.468    | 7.360    |
| 1.60E-02               | 0.185                   | 8.033    | 7.442    | 7.336    |
| 6.00E-03               | 0.370                   | 7.888    | 7.306    | 7.203    |

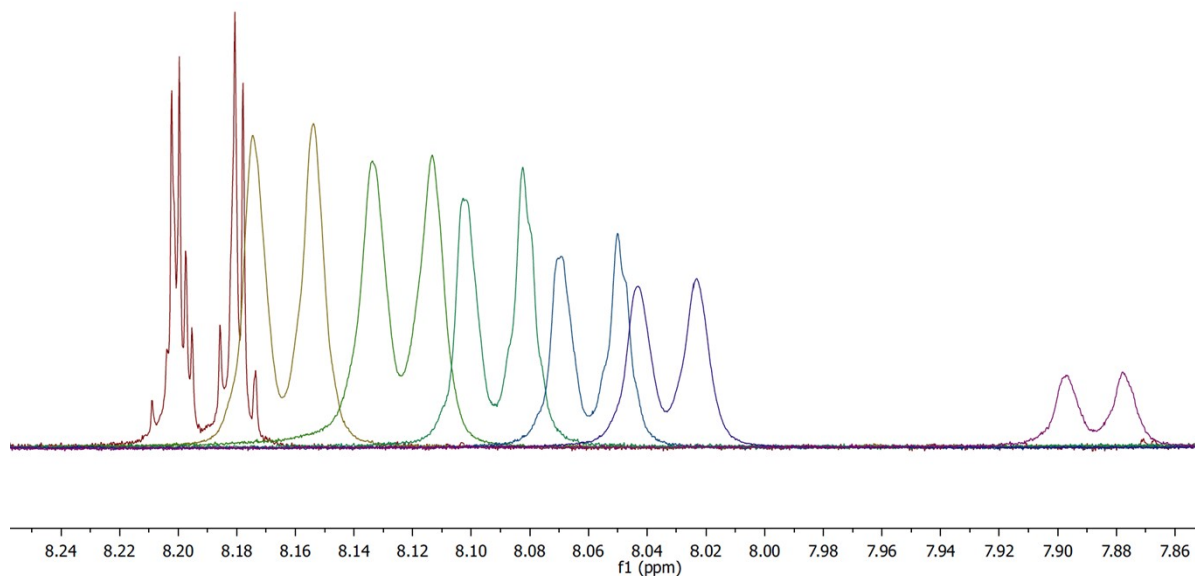

Figure S45.  $^1\text{H}$  NMR spectrum overlay for ortho proton of  $\text{PhICl}_2$  and 0 (red), 1 (yellow), 2 (green), 3 (cyan), 4 (blue), 5 (purple) and 10 (magenta) equivalents of  $\text{NBu}_4\text{Cl}$  in  $\text{CDCl}_3$ .

b.  $\text{PhICl}_2 + \text{NBu}_4\text{OTf}$  (20%)

Link: <http://app.supramolecular.org/bindfit/view/b78d3215-d747-4b10-aa2b-4d7887163379>

Table S6. Excel data used for BindFit experiment.

| Host concentration / M | Guest concentration / M | Proton 1 | Proton 2 | Proton 3 |
|------------------------|-------------------------|----------|----------|----------|
| 0.023                  | 0.023                   | 8.184    | 7.600    | 7.479    |
| 0.023                  | 0.045                   | 8.180    | 7.599    | 7.477    |
| 0.023                  | 0.068                   | 8.174    | 7.596    | 7.474    |
| 0.023                  | 0.091                   | 8.169    | 7.594    | 7.471    |
| 0.023                  | 0.113                   | 8.165    | 7.592    | 7.469    |
| 0.023                  | 0.227                   | 8.138    | 7.576    | 7.451    |

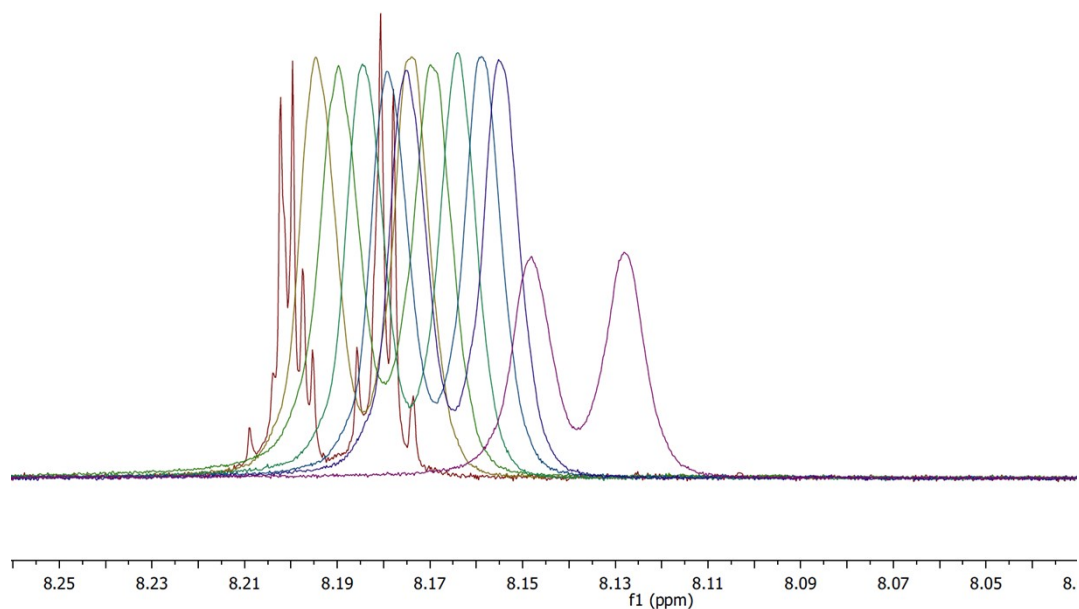

Figure S46.  $^1\text{H}$  NMR spectrum overlay for ortho proton of  $\text{PhICl}_2$  and 0 (red), 1 (yellow), 2 (green), 3 (cyan), 4 (blue), 5 (purple) and 10 (magenta) equivalents of  $\text{NBu}_4\text{OTf}$  in  $\text{CDCl}_3$ .

#### IV. Electrochemical Analysis

Table S7. Reduction potential values for  $\text{PhICl}_2$  with different mol% of  $\text{NBu}_4\text{Cl}$  added.

|                                                                  | <b>0% <math>\text{Cl}^-</math></b> | <b>5 mol% <math>\text{Cl}^-</math></b> | <b>20 mol% <math>\text{Cl}^-</math></b> |
|------------------------------------------------------------------|------------------------------------|----------------------------------------|-----------------------------------------|
| $E_p^{1/2}$ (ferrocene)                                          | +0.408 V                           | +0.407 V                               | +0.500 V                                |
| <b>R-<math>\text{ICl}_2</math></b> (vs $\text{Ag}/\text{Ag}^+$ ) | -0.493 V                           | -0.688 V                               | -0.698 V                                |
| <b>R-<math>\text{ICl}_2</math></b> (vs $\text{Fc}/\text{Fc}^+$ ) | -0.901 V                           | -1.095 V                               | -1.198 V                                |
| Difference from 0% $\text{Cl}^-$                                 | 0 V                                | -0.195 V                               | -0.205 V                                |
| <b>PhI-(X)<math>_2</math></b> (vs $\text{Ag}/\text{Ag}^+$ )      | -2.744 V                           | -2.785 V                               | -2.762 V                                |
| <b>PhI-(X)<math>_2</math></b> (vs $\text{Fc}/\text{Fc}^+$ )      | -3.152 V                           | -3.192 V                               | -3.262 V                                |



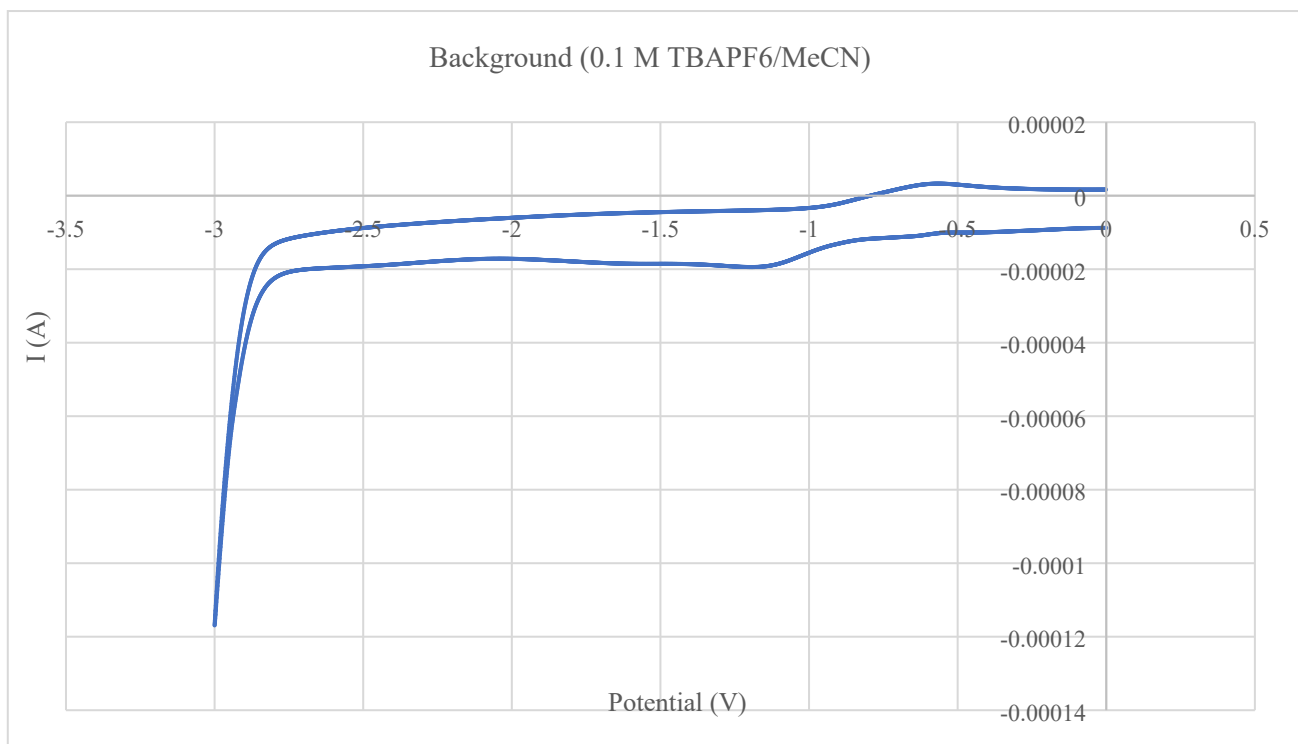

Figure S47. Cyclic voltammogram of TBAPF<sub>6</sub> in MeCN. Scan rate of 200mV/s. Redox peak at  $E_p^{1/2}$  at  $\sim -0.85$  V is indicative of O<sub>2</sub>.

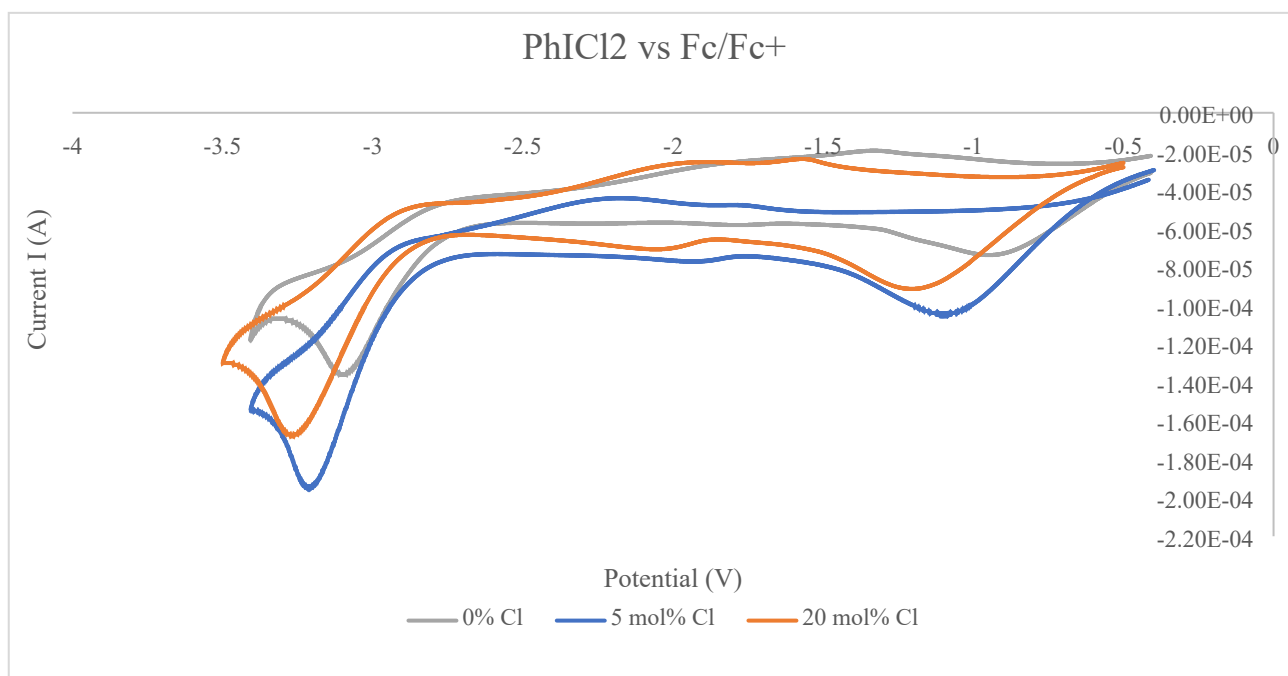

Figure S48. Cyclic voltammogram of PhICl<sub>2</sub> with differing concentrations of NBu<sub>4</sub>Cl in MeCN (0.1 M TBAPF<sub>6</sub>). Scan rate of 200mV/s.



## V. X-ray Crystallographic Details

Tetraethylammonium chloride (3 mg, 0.018 mmol) was added to a warm solution of PhICl<sub>2</sub> (5 mg, 0.018 mmol) in minimum dichloromethane. The reaction mixture was stirred until the solution turned clear before cooling (-20 °C). Pale yellow needle-like crystals (91%) were obtained overnight.

X-ray data were collected using a Rigaku XtaLAB Synergy, Dualflex, Pilatus 300K diffractometer employing monochromated Mo-K $\alpha$  radiation at 100(2) K and solved using SHELXT with further structural refinements carried out using SHELXL within the OLEX2 graphical user interface. Non-hydrogen atoms were refined anisotropically and hydrogen atoms placed using a riding model. The CIF has been deposited with the CSD (CCDC 2091146).

**Crystal Data** for C<sub>20</sub>H<sub>30</sub>Cl<sub>5</sub>I<sub>2</sub>N ( $M = 715.50$  g/mol): monoclinic, space group *I2/a* (no. 15),  $a = 9.8786(4)$  Å,  $b = 17.2644(6)$  Å,  $c = 15.6853(6)$  Å,  $\beta = 101.359(4)^\circ$ ,  $V = 2622.70(18)$  Å<sup>3</sup>,  $Z = 4$ ,  $T = 100(2)$  K,  $\mu(\text{Mo K}\alpha) = 2.916$  mm<sup>-1</sup>,  $D_{\text{calc}} = 1.812$  g/cm<sup>3</sup>, 16675 reflections measured ( $4.822^\circ \leq 2\Theta \leq 56.562^\circ$ ), 3242 unique ( $R_{\text{int}} = 0.0390$ ,  $R_{\text{sigma}} = 0.0290$ ) which were used in all calculations. The final  $R_1$  was 0.0239 ( $I > 2\sigma(I)$ ) and  $wR_2$  was 0.0506 (all data).

## 2. COMPUTATIONAL SECTION

All the calculations were carried out using Gaussian 16 revision C.01 unless noted.<sup>3</sup> Geometry optimisation was carried out at the B3LYP-D3(BJ)/def2-TZVPPD (PCM, SMD, chloroform) level of theory.<sup>4-8</sup> Some geometries were also calculated with dichloromethane solvation for comparison. Harmonic vibrational frequencies were computed analytically at the same level of theory in order to characterise the stationary points as minima on the potential energy surface and determine thermochemical properties. Molecular orbital (MO) and Natural Bond Orbital (NBO) analysis was carried out on the optimised geometries at the same level of theory. NBO analysis was performed using NBO 6.0.<sup>9</sup>

ORCA 5.0.0 was used to perform single point calculations at the DLPNO-CCSD(T)/ma-def2-QZVPP level of theory (inclusive of CPCM solvation).<sup>10</sup> The single point electronic energies were converted to free energies

( $\Delta G$ ) by adding the free energy correction calculated at the B3LYP-D3(BJ)/def2-TZVPPD (SMD) level of theory.

**Cartesian coordinates computed at the B3LYP-D3(BJ)/def2-TZVPPD (SMD, chloroform) level of theory. Units of Ångström.**

**PhICl<sub>2</sub>**

Ee = -1450.02927382

|    |           |           |           |
|----|-----------|-----------|-----------|
| I  | -1.132833 | 0.000002  | -0.000004 |
| C  | 0.976397  | 0.000005  | -0.000003 |
| C  | 1.635160  | -0.154816 | -1.209932 |
| C  | 3.025212  | -0.155760 | -1.197176 |
| C  | 3.715721  | -0.000005 | 0.000000  |
| C  | 3.025210  | 0.155756  | 1.197175  |
| C  | 1.635158  | 0.154820  | 1.209928  |
| H  | 1.089019  | 0.274700  | 2.133647  |
| H  | 3.563654  | 0.277115  | 2.126987  |
| H  | 4.797174  | -0.000009 | 0.000002  |
| H  | 3.563657  | -0.277124 | -2.126986 |
| H  | 1.089022  | -0.274693 | -2.133652 |
| Cl | -1.125847 | -2.533300 | -0.001334 |
| Cl | -1.125869 | 2.533303  | 0.001348  |

**PhICl<sub>3</sub><sup>-</sup>**

Ee = -1910.42958712

|    |           |           |           |
|----|-----------|-----------|-----------|
| I  | -0.691279 | 0.016262  | 0.000012  |
| C  | 1.449401  | 0.006666  | 0.000838  |
| C  | 2.124877  | 0.014625  | -1.211372 |
| C  | 3.515774  | -0.007873 | -1.204282 |
| C  | 4.209024  | -0.037673 | 0.001422  |
| C  | 3.514813  | -0.042909 | 1.207295  |
| C  | 2.123767  | -0.020032 | 1.213647  |
| H  | 1.578676  | -0.026934 | 2.146986  |
| H  | 4.053509  | -0.066464 | 2.145301  |
| H  | 5.290775  | -0.057026 | 0.001486  |
| H  | 4.055172  | -0.003758 | -2.142171 |
| H  | 1.580671  | 0.034861  | -2.145029 |
| Cl | -0.565638 | -2.526505 | -0.012108 |
| Cl | -0.562970 | 2.569762  | 0.005873  |
| Cl | -3.668273 | -0.056161 | 0.003147  |

**PhI**

Ee = -529.569713507

|   |           |           |           |
|---|-----------|-----------|-----------|
| I | 0.000000  | 0.000000  | 1.550509  |
| C | 0.000000  | 0.000000  | -0.564319 |
| C | 0.000000  | 1.210860  | -1.246275 |
| C | 0.000000  | 1.202771  | -2.637601 |
| C | 0.000000  | 0.000000  | -3.334931 |
| C | 0.000000  | -1.202771 | -2.637601 |
| C | 0.000000  | -1.210860 | -1.246275 |
| H | 0.000001  | -2.146340 | -0.706061 |
| H | 0.000000  | -2.142883 | -3.173156 |
| H | 0.000000  | 0.000000  | -4.416516 |
| H | 0.000000  | 2.142883  | -3.173156 |
| H | -0.000001 | 2.146340  | -0.706061 |

**Cl<sub>2</sub>**

Ee = -920.429940367

|    |          |          |           |
|----|----------|----------|-----------|
| Cl | 0.000000 | 0.000000 | 1.006207  |
| Cl | 0.000000 | 0.000000 | -1.006207 |

**[PhICl<sub>2</sub>-Cl-PhICl<sub>2</sub>]<sup>-</sup>**

Ee = -3360.47333631

|   |           |           |           |
|---|-----------|-----------|-----------|
| I | -2.191071 | -0.646178 | 0.111409  |
| C | -3.683042 | 0.868162  | 0.160534  |
| C | -4.787054 | 0.702381  | 0.984270  |
| C | -5.752135 | 1.703106  | 1.013421  |
| C | -5.602251 | 2.842398  | 0.229415  |
| C | -4.487587 | 2.988225  | -0.589882 |
| C | -3.514302 | 1.995725  | -0.630185 |
| H | -2.644515 | 2.101256  | -1.262881 |
| H | -4.371326 | 3.874088  | -1.199784 |

|    |           |           |           |
|----|-----------|-----------|-----------|
| H  | -6.355740 | 3.618143  | 0.257119  |
| H  | -6.618975 | 1.590048  | 1.650718  |
| H  | -4.895278 | -0.184715 | 1.591889  |
| Cl | -3.518509 | -1.762577 | -1.747078 |
| Cl | -1.017347 | 0.610720  | 1.992236  |
| Cl | 0.000139  | -2.795352 | 0.000690  |
| I  | 2.191495  | -0.646720 | -0.111351 |
| C  | 3.682664  | 0.868405  | -0.160835 |
| C  | 4.786992  | 0.703037  | -0.984224 |
| C  | 5.751501  | 1.704311  | -1.013391 |
| C  | 5.600753  | 2.843737  | -0.229741 |
| C  | 4.485773  | 2.989161  | 0.589199  |
| C  | 3.513048  | 1.996111  | 0.629501  |
| H  | 2.643026  | 2.101321  | 1.261928  |
| H  | 4.368829  | 3.875125  | 1.198821  |
| H  | 6.353814  | 3.619897  | -0.257451 |
| H  | 6.618582  | 1.591580  | -1.650419 |
| H  | 4.895898  | -0.184172 | -1.591559 |
| Cl | 1.017681  | 0.608167  | -1.993430 |
| Cl | 3.519040  | -1.761403 | 1.748174  |

### 3. REFERENCES

1. Poynder, T. B.; Orué, A. I. C.; Sharp-Bucknall, L.; Flynn, M. T.; Wilson, D. J.; Arachchige, K. S. A.; Clegg, J. K.; Dutton, J. L., On the activation of PhICl<sub>2</sub> with pyridine. *Chemical Communications* **2021**.
2. Thordarson, P., Determining association constants from titration experiments in supramolecular chemistry. *Chemical Society Reviews* **2011**, *40* (3), 1305-1323.
3. Frisch, M. J.; Trucks, G. W.; Schlegel, H. B.; Scuseria, G. E.; Robb, M. A.; Cheeseman, J. R.; Scalmani, G.; Barone, V.; Petersson, G. A.; Nakatsuji, H.; Li, X.; Caricato, M.; Marenich, A. V.; Bloino, J.; Janesko, B. G.; Gomperts, R.; Mennucci, B.; Hratchian, H. P.; Ortiz, J. V.; Izmaylov, A. F.; Sonnenberg, J. L.; Williams, D. J.; Ding, F.; Lipparini, F.; Egidi, F.; Goings, J.; Peng, B.; Petrone, A.; Henderson, T.; Ranasinghe, D.; Zakrzewski, V. G.; Gao, J.; Rega, N.; Zheng, G.; Liang, W.; Hada, M.; Ehara, M.; Toyota, K.; Fukuda, R.; Hasegawa, J.; Ishida, M.; Nakajima, T.; Honda, Y.; Kitao, O.; Nakai, H.; Vreven, T.; Throssell, K.; Montgomery Jr., J. A.; Peralta, J. E.; Ogliaro, F.; Bearpark, M. J.; Heyd, J. J.; Brothers, E. N.; Kudin, K. N.; Staroverov, V. N.; Keith, T. A.; Kobayashi, R.; Normand, J.; Raghavachari, K.; Rendell, A. P.; Burant, J. C.; Iyengar, S. S.; Tomasi, J.; Cossi, M.; Millam, J. M.; Klene, M.; Adamo, C.; Cammi, R.; Ochterski, J. W.; Martin, R. L.; Morokuma, K.; Farkas, O.; Foresman, J. B.; Fox, D. J. *Gaussian 16 Rev. C.01*, Wallingford, CT, 2016.
4. Becke, A. D., Density-functional exchange-energy approximation with correct asymptotic behavior. *Physical Review A* **1988**, *38* (6), 3098-3100.
5. Grimme, S.; Antony, J.; Ehrlich, S.; Krieg, H., A consistent and accurate ab initio parametrization of density functional dispersion correction (DFT-D) for the 94 elements H-Pu. *The Journal of Chemical Physics* **2010**, *132* (15), 154104.
6. Grimme, S.; Ehrlich, S.; Goerigk, L., Effect of the damping function in dispersion corrected density functional theory. *Journal of Computational Chemistry* **2011**, *32* (7), 1456-1465.
7. Weigend, F.; Ahlrichs, R., Balanced basis sets of split valence, triple zeta valence and quadruple zeta valence quality for H to Rn: Design and assessment of accuracy. *Physical Chemistry Chemical Physics* **2005**, *7* (18), 3297-3305.
8. Rappoport, D.; Furche, F., Property-optimized Gaussian basis sets for molecular response calculations. *The Journal of Chemical Physics* **2010**, *133* (13), 134105.
9. Glendening, E. D.; Landis, C. R.; Weinhold, F., NBO 6.0: Natural bond orbital analysis program. *Journal of Computational Chemistry* **2013**, *34* (16), 1429-1437.
10. Neese, F., The ORCA program system. *WIREs Computational Molecular Science* **2012**, *2* (1), 73-78.
